# Supplementary material for: De novo biosynthesis of simple aromatic compounds by an arthropod (Archegozetes longisetosus)
Source: PubMed Central journal article supplement (PMC7542773; doi:10.1098/rspb.2020.1429), 2020-09-02
Supplement: rspb20201429supp5.pdf [file rspb20201429supp5.pdf]

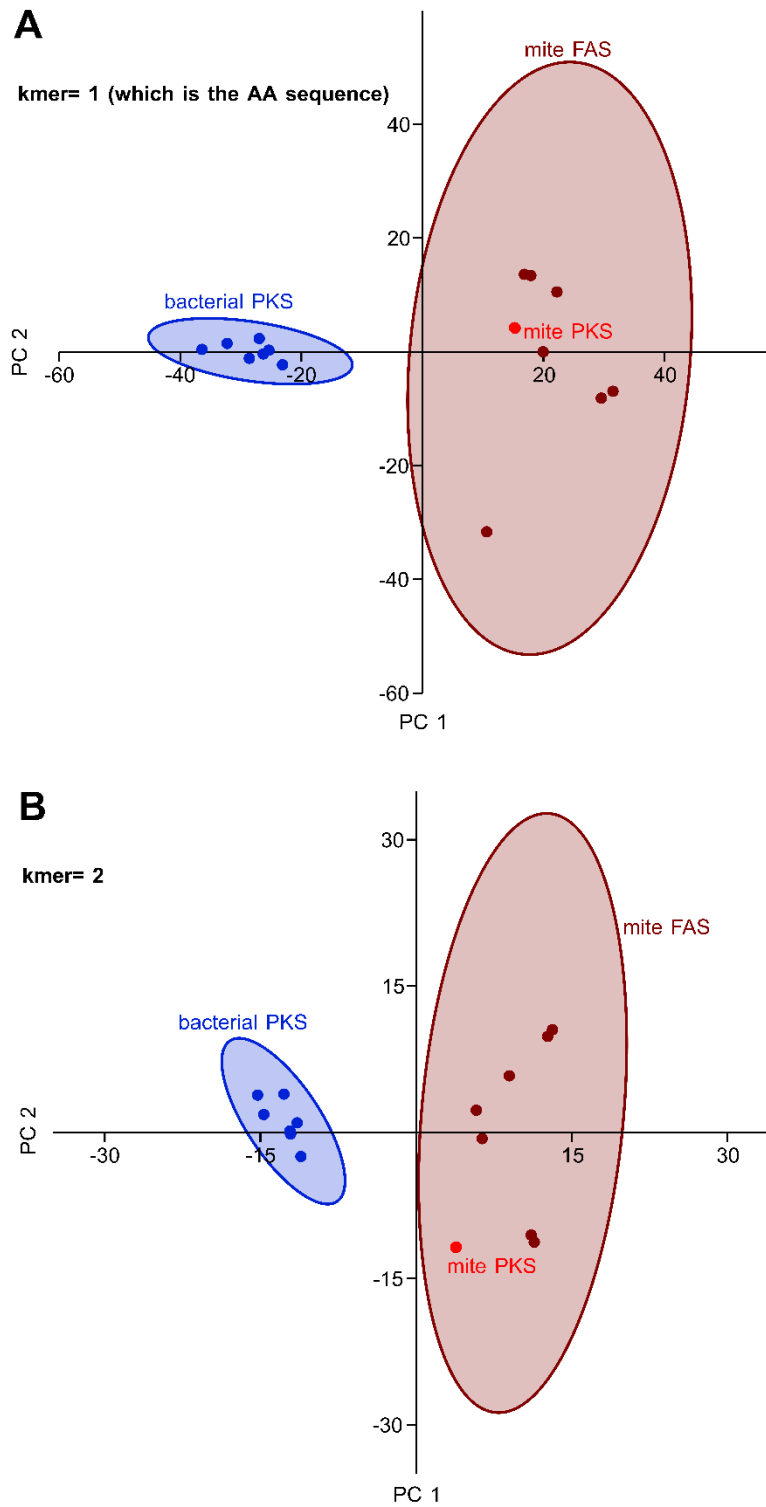

**Figure S5.** Principle component analyses of the kmer-counting matrices for (a) kmer=1, which equals the amino acid sequence and (b) kmer=2. In both cases the mite sequences including the mite polyketide synthase (red; PKS) were distinctly different from the bacterial PKS (blue). Ellipses represent the 95% confidence.
