# Supplementary material for: De novo biosynthesis of simple aromatic compounds by an arthropod (Archegozetes longisetosus)
Source: PubMed Central journal article supplement (PMC7542773; doi:10.1098/rspb.2020.1429), 2020-09-02
Supplement: rspb20201429supp6.pdf [file rspb20201429supp6.pdf]

**Table S1.** Enrichment factors of the respective ions in treatment groups compared to the control calculated based on mass spectrometry. The mass/charge ratios ( $m/z$ ) 136 and 150 are the molecular ions of 2-hydroxy-6-methyl-benzaldehyde and 3-hydroxybenzene-1,2-dicarbaldehyde, respectively and thus showed no enrichment.

| $m/z$                                             | <sup>13</sup> C <sub>6</sub> , d <sub>7</sub><br>D-glucose | <sup>13</sup> C <sub>3</sub><br>malonic acid | sodium<br>[ <sup>13</sup> C <sub>1</sub> ] acetate | [ <sup>13</sup> C <sub>6</sub> ]<br>phenylalanine |
|---------------------------------------------------|------------------------------------------------------------|----------------------------------------------|----------------------------------------------------|---------------------------------------------------|
| <b><u>2-hydroxy-6-methyl-benzaldehyde</u></b>     |                                                            |                                              |                                                    |                                                   |
| 136 [M <sup>+</sup> ]                             | 0                                                          | 0                                            | 0                                                  | 0                                                 |
| 137                                               | 8                                                          | 5                                            | 3                                                  | 3                                                 |
| 138                                               | 62                                                         | 38                                           | 21                                                 | 19                                                |
| 139                                               | 180                                                        | 60                                           | 17                                                 | 23                                                |
| 140                                               | 269                                                        | 72                                           | 3                                                  | 23                                                |
| 141                                               | 94                                                         | 25                                           | 13                                                 | 3                                                 |
| 142                                               | 87                                                         | 23                                           | 14                                                 | 2                                                 |
| 143                                               | 86                                                         | 18                                           | 15                                                 | 1                                                 |
| 144                                               | 47                                                         | 17                                           | 8                                                  | <1                                                |
| <b><u>3-hydroxybenzene-1,2-dicarbaldehyde</u></b> |                                                            |                                              |                                                    |                                                   |
| 150 [M <sup>+</sup> ]                             | 0                                                          | 0                                            | 0                                                  | 0                                                 |
| 151                                               | 4                                                          | 1                                            | 1                                                  | 2                                                 |
| 152                                               | 64                                                         | 20                                           | 2                                                  | 24                                                |
| 153                                               | 423                                                        | 48                                           | 14                                                 | 66                                                |
| 154                                               | 2112                                                       | 151                                          | 143                                                | 252                                               |
| 155                                               | 1170                                                       | 23                                           | 59                                                 | 96                                                |
| 156                                               | 938                                                        | 15                                           | 42                                                 | 37                                                |
| 157                                               | 668                                                        | 2                                            | 30                                                 | 21                                                |
| 158                                               | 737                                                        | 1                                            | 31                                                 | 1                                                 |
