# Supplementary material for: De novo biosynthesis of simple aromatic compounds by an arthropod (Archegozetes longisetosus)
Source: PubMed Central journal article supplement (PMC7542773; doi:10.1098/rspb.2020.1429), 2020-09-02
Supplement: rspb20201429supp7.pdf [file rspb20201429supp7.pdf]

**Table S2.** Amino acid alignment of curated KS-domains of bacterial, fungal and animal PKS as well as animal FAS, including putative PKS/FAS from *A. longisetosus*. Sequences will be deposited in the NCBI database, and accession numbers provided upon acceptance of the manuscript.

>AAD43562.2\_Fum1p\_Fusarium\_verticillioides\_

-VAIVGMGMRLPGGIHTPDELWGMLVEKRST-RCEIPPTR-FSVDGFHSPSS--KPGSIAMR-HGHFLDDKD-  
DLHRLDTSFFSMGMTEVSDIDPQQRMLLEVA YECMQS---SG-----QTNWRGSGNIGCYVGVWGEDW----LDLHSK--DLYDSGTYRVSGGHDF--AI-  
SNRISYEDLKGPSFTIKAGCSSLIALHEAVRAIRAGDCDGAIVAGTNLVFSPMTMSVA--MTEQ-----GVL-SPDASCKTFDAN---A-NGYARGEA-INAIFLKP--  
LNNALREGDP-IRALVRATSSNSDGKTP-----GMSMPSSSEHEALIRRAYGEVF--LD-PKD----TCFVEAHGTGTSVGDPLEATAIAR-VF----  
GGSSDNKLYIGSVKPNLGHSEGASGVSSVMKA-VLALENRTIPPNNIFS--TP-NPKIP--FSEMNMVAVPVDAIPWP-----  
RDRPLRVSVNSFGGANAHVILESGIP-----YLGSRSLPNESQ

>AAO62426.1\_type\_I\_polyketide\_synthase\_Phoma\_sp.\_C2932\_

PIAIIIGMCRFPGNATSPEKLWELCAQGRSA-WSSIPKSR-FRQEGFYNPNAE-RVGTSHVV-GGHFLEE---  
DPSLFDASFFNLSAEAAKTMDPQFRLQLESVYEAEMES---AGIT---LEHIAGSDTSVYAGACFRDY----HDSLVR--DPDLVPRFLLTGNG-A--  
AMSSNRVSHFYDLRGASMTVDTGCSSTLTALHLACQGLRNRESKTSIVTGANVILNPDMPVT--MSSL-----GLL-GPEGKSHTFDAR---A-NGYGRGEG-  
IATVVIKR--LDDALRAQDP-IRCIIRGTALNQDGRAT-----LTSPTSQAQSDLIRACYRAAA---LD-PND---TAFLLAAGTGTGTGDAVEIAAAAD-VFGEKRSP--  
ERPLWIGSVKTNIGHSEATSGLASVIQAALALEKGLIPPNNIFK----EPNEKLGQVSAAVRVPNSLQKWPSVSG-----  
VRRASVNNFGYGGANAHVILESGIP-----GHTPIANGS

>AAR85531.1\_polyketide\_synthase\_Didymella\_maydis\_

PIAIVGLSFRGPGDATSAENLLRMVAESRES-RSPIPSQK-WNASGHYHPDPS-RQGS-HIVEYGHWFQ---  
DVVEFDAPFFNLSA VESAALDPQQRMLLECTYEAFFEN---SGMP--LNKLVGTDTSVFTAVFCTDY----TDMLWR--DPEMVPMYQCTNSG-  
ATRANMANRVSYFDFLKGPSITVDTACSGGLTALHLACQSLVTGESTQAVVSGSSLILGPETMVT--MSMM-----RFL-SPDGRCYAFDDR---A-NGYARGEG-  
VTVLLKR--LDDALANGDT-IRAVIRGTGRNPDGKTT-----GIAMPSGLAQEALIRSVYAKTG--LD-LLD---TAYIECHGTGTQAGDTTEARAINN-VF---  
GPGRQVPLAIGSVKTNIGHLEAASGLAGVLKCILMLENEIILPNRNFK----HANLNIPLEWKLVRPTTVEPWNSMT-----  
TRRASVNSFGYGGTNVHAILESADNYMGQRADPQVFAVSAFDPTAGEACAKNLAYVVEERQDMTFLSSLAFTLSDRRT

>AAR90237.1\_polyketide\_synthase\_partial\_Botrytis\_cinerea\_

----TRGGNFKG-----DLAAFDPSPFFSITAEAKAMDPOHRLLETTYQALEN---AGIP---  
LSKASGTKTGVYTGSMADY----RFTSLK--DPEDLPKYAVTGTA-M--  
SLLANRLSWFFNLKGGPSINLDSACSSSLMALDIACQGLRNGDSSMAIVAGSCLISLETWIS--LCNM-----GFL-SPDRCYSFDNR---A-NGYARSEG-  
VGVVVIKK--LSDALKDNDT-IRAVIRATGNSNDGHTP-----GITQPSREAQTRLIEETIYKGG--LD-PAK---TRYFEAHGTGTPLGDPGIEAGAIGS-VFREYRSA--  
TEPLYVGALKSNIGHLEGGSGIAGLIKTVLVLEKGIIPNANFE-QA-NSNID--AEFFHLRFPTQAPWP--SQ---G-----  
LRRASVNSFGFGGNSHCVNRATASFKFSVDPQLLVFSAVVDKDGIRRVAEAYRSYF-AGHALSFLRDLAYTLVSRRT

>AAR90238.1\_polyketide\_synthase\_Botrytis\_cinerea\_

PIAIVGISCRFPAGANSPEELWLSISQKSA-WSDVPEDR-FNWKSFHLPSSD-VVGTINSR-GGHFIDQ---  
DIRTFDAGFFGIPPAEANAMDPQHRLQLETA YEALEN---AGIS---LEKVRGSSTSVYVAIFNRDY----DRMMFK--DTNDIAKYHLLGSG-E--  
AIASNRISYFFDLKGGPSMTVDTGCSGSLVALHQACQGLRSGDMDALVGGTSLILSPDTMVP--MSRM-----NVL-DPSGKSFVDDR---G-VGYGRGEG-  
VATIVLKR--LKDALNAGDH-VRAVIRNTGINQDGKTS-----GIALPSQVAQALANHVFKQVG--LD-PCK---INVEAHGTGTIAGDLAETKSIAN-VF---  
CTERKKTLYIGSIKSNIGHLESASGAAGLLKAILVLEKGLIPPVNLNLS---NHKKGLDLEQSNIVVPSKIEKLSVDEDEG-----  
KSRIAINSFGYGGTNAHAILETAPLSQGSMAKLFSLSAKSKASLIENIKLRWASEFKATNQLENLSYTLNQRRS

>AAR90239.1\_polyketide\_synthase\_Botrytis\_cinerea\_

PVAIIIGSSCRFTGA-SNTSKLWELLKEPRDV-LSKIPEER-FLAEGFYHQDQG-HHGTSNVL-HSYLLDE--  
NPLAFDASFFHIHNREAEICDPQQRLLLENYETIES---ACYP--METIRGSDTGVFVGLMCADY----YDVQMR--DPETLPQYFSTGTA-R--  
SIVSNRISYFFDWKGPSMTVDTACSSSLVAVHQAVSALRNGECSAV AAGVNLIFGPEMFNG--EANL-----KML-SPTGTCKMWDAS---A-DGYARREG-  
CGSVMLKL--LEDAIRDGDR-IESVIRETGVNSDGRM-----GITMPSASSQEKLKETYRRAG--LD-PSKESDRQCFFEAHGTGTLAGDRQEAEAISR-  
AFDLYQTSQDNLPLSVGSIKTVGHLEGCAGIAGLLKASLALQHSFIPNMHFQ-EL-NPEIE--PFYQNLKVVTSLQWPW--LI---PDNT----  
PRRASINSFGFGGTNAHAILESYSAEQNTINTIVPLLLSASSEHSLVELTKKYLDHL-KTHPFQNLQDICWTALSCRS

>AAR90240.1\_polyketide\_synthase\_Botrytis\_cinerea\_

PIAIIIRGRCRLAGGCQSPSELWNFLQTPYDV-SQEFFPDR-NSASRHSSTSTRGYFLSQ-----DVREFDASFFSLSPLEAQAMDPOHRLLETTYEALIEE--  
AGIP---AETLRGSDTAVYTGVMFHDIY----LSLSSQ--DHMAIPKYHITGTA-P--  
NKASNRISYFFDWKGPSMTVDTACSSSLVALDHAVVQQLRSGSSTLVAAGANLLLDGRPFIG--FNNM-----GML-SPTGSCCKMWDTE---A-DGYARREG-  
ILAMLLKP--LRLALADGDN-IQCVIRETGVNHNHGRS-----GITLPSASAQTSLRIDVYHRAG--LD-PTNPSDRPQYIEAHGTGTQAGDPLEAEALAA-  
AFSLTSSQDEAHMLVGSIKTVIGHTEGAAGLAGVLKASLAIHQHGIIPNLGFQ-QL-NKKVA--PYCTNMDVVTSVQWPW--AM---ASNT----  
PRRVINSFGFGGANAHVILESVPLLSRSDSVLPYVFAAASEQSLISMLKRYENYL-QENPSINPNELTTTLASHRS

>AAR90241.1\_polyketide\_synthase\_Botrytis\_cinerea\_

PIAIIIGMACRFPGGNSPSKLDLIKSPRNL-SKRVPDER-FNSEAFFHTNGS-YHGATDSR-EAYFLEE--  
DVALFDNAFFNIQPGEAEEVDPQQRLLMETVYDSLCA---GGQT---IEGLRGSNTGIYVGMCCDDW-----AQAINR--DWESTMTYAATGQS-R--  
AIVSNRISYFFDWKGPSMTVDTACSSSLVAVHQVTSRNGECPVVAAGVNLILGPMWIA--ESKL-----HML-SPTGTCKMWDDES---A-DGYARREG-  
IASVVMKR--LSDALRDGDP-IECVIRGTGVNQDGK--TP--GLTMPNGKAQADLIRDYQYRAG--LD-  
IHDPRDRPQFFHAHGTGTQAGDPQESQAIDSAFFSGPDKK--LETMAVGSIKTIIGHTEGTAGLASLIGSVMAIKHGVFPNLFHQ-NL-SPKVA--  
PFYNHLHIPPTATPWP--EL---PSGV---PRRISCNSFGFGGLNAHAIIIESYESEATLASVFTPLTISAASALKATLSDIRSYL-EKSPDVNMHDLAHTLQSRRS

>AAR90242.1\_polyketide\_synthase\_\_Botrytis\_cinerea\_

PIAVIGTGRCPGGASSPSKLWNLHHPYDL-TQKVPSSR-FNIKAFYHPNGE-HHGTTNAT-KSYFLNE---  
DPTTFDAPFFNINPREAEALDPQQRLLLETVYEALAE---AGLS---IEEMQGTSTAVYVGLMCADY----FDVLMR--DIEDIPQYLATGTA-R--  
SIMSNRISYFFDWKGPSTMTIDTACSSSLVAVHNAISTLRSGQSRATAAAGANLIFGPEMYIG--ESNL-----HML-SPTGRSQMWDSR---A-DGYARGEG-  
TAAIVLKT--LKNALKEDDD-IEYIIRETGVNSDGKSK-----GITMPLAASQADLIRQTYARAG---LD-  
CTKPSERCQYFEAHGTGTPAGDPVVEAEISSAFFPQRSIDLNSEPLHVSGIKTVIGHLEGAAGLAGIAGLALKEKTIIPPNLHFQ-SL-NSAIE--  
PFYGNLNVPTAPLPWP--AV---EG-----PLRASVNSFGFGGTNAHAILESVEVPSLESTALIPFTISAISEDCLIQNTNFSYDI-EEHEGVNLDLGYSLGRSN

>AAR90244.1\_polyketide\_synthase\_\_Botrytis\_cinerea\_

PIAIVGISCRPLGNVSTPDEFWELCSRARS-GWSEIPKER-FDTASFYHPNPG-KAGC-FNAAGGNFLKE---  
DVGLFDAPFFSLTAQEATSMDPQQRILLECTFEALES---AGIP---KHEIVGKDVGVFVGGSFSEY----ESASFV--DTDSVPMYQATGKLF--  
LSNRISHFFDLRGPSTMTIDTACSSSLVALHQACQSIRNGECKSAITGGCHLNMLPENWISIPFCEIPSNKYRLF-SDEGRSFSFDSR---G-TGYGRGEG-  
CGLVILKP--LSQAQKQGF-IRAVVQNSVANQDGKTP-----GITMPLAASQADLIRQTYARAG---LD-  
VFGEGRNA--RNPLFIGSVKSNIGHLEAASGIISVIKTAMMLERGFILPNHDFK---TPNENIPFSKWHLKVPISQRPWP-----  
RAKKFASVNNFVGGGTNAHVVLERAPFSEKALQDRRMIALSANDKGALEALMKNIGIYLERPEFGLMSNVA YTLGQRR-

>AAR90247.1\_polyketide\_synthase\_\_Botrytis\_cinerea\_

PIAVVGMSCRLSGDASDTQKLWELLKGRSA-WSKVPKDR-FNQEAFHDPSEAGKPGR-TSTDGGHFLKD---  
DIKAFDAPFFNINPIEATAMDPQQRLLLEIAYEAFEN---AGLT---LEQLSGSNTGVYVGGWASDY----QEMLLR--DIDFPPIYQASVGV-A--  
AISSNRISYCFNLHGPSLTLDTGCSASLVALHQAVHSLRAGETDKCFVAVGNLQLDPQRYGY--QNKL-----SMF-SKQGKSFTFDHRAKTA-SGYGRGEG-  
CSGVVLMF--LSQAQKQGF-IRAVVQNSVANQDGKTP-----GITMPLAASQADLIRQTYARAG---LD-  
ESDSPILIGSLKANIGHTESAAGLTGLIKA VLMLEHNMIPPQVNF-KA-NPEID--LDALNLRIPITLESRP-----  
LKRISVNSFGYGGTNAHVVDAAAREEDASRAKERLFLVLSAASEKSCQDMSSKVAKYLESKADSTLLSRLAYTLRRSV

>AAR90260.1\_polyketide\_synthase\_\_Bipolaris\_maydis\_

PLAIVGLATRFPPQEAYNTEQLWQFLLAKRCA-HTPIPEGR--MGPGHYHPDPE--HGGTHAVAGGHFLAE---  
DPA YFDSFFGITKGEAMSLDPQQRV VLENVYLALEN---SGFT---LEQVAGSNTSVYVSGFNHHDH----LAILNS--DPETTLRHRVTGLT-N--  
SMHSNRVSWFFDLKGPSTMTIDTACSSSMAALHLGQSLRTGESDMSIITGVITLNYPGDVNG--MSHQ-----GFL-SPDGRCSFDFHR---A-NGFARGEG-  
AGTVILKP--LDALRDGDTP-IRAVVLRATATNEDGHTP-----GILTLPSSDAQERLIRRTYASAG---LN-FDD---TTLVEAHGTGTQGDIAEARGIAQ-AF-----  
RKDKPL YLGSV KASVGHLEGAAGVAGIISVLALENGVIPPQANFE-KA-NPKIP--FQKWNLSIADKAVPWP-----  
TQGLRRVNSVSGYGGTNAHVVDAAAREEDASRAKERLFLVLSAASEKSCQDMSSKVAKYLESKADSTLLSRLAYTLRRSV

>AAR90261.1\_polyketide\_synthase\_\_partial\_\_Bipolaris\_maydis\_

PIAIIAGFRGPGDARDPEAFYRMLIEGRSA-RTEIPKDR-YNVDAFYHPDPE-RLGSIQQR-YAHFLQ---  
DFKAFDAPFFSITPKEAKAMDPTHRILLEAAYEGFEN---AGLT---LDQVSGTQTSCYIGTFTADF----PNLQAR--DNEGPSIYHATGMS-S--  
SLASNRISYFFDLHGPSLTLDTACSSSLTAFHLACQSLRTGESEMSVVGANLMMFGPDMISL--LGAA-----KIL-SPEGKSKMWDAN---A-DGFARGEG-  
FGTVILKP--LDALRDGDTP-IRAVVLRATATNEDGHTP-----GILTLPSSDAQERLIRRTYASAG---LN-FDD---TTLVEAHGTGTQGDIAEARGIAQ-AF-----  
GRKSSLYVGSVKTNIHLEGAAGVAGVIKAAALVERGLIPQNLWFE-KL-NPEIN---LPENVEIPLKLTWPWSDG-----  
PRRASINSFGYGGANAHVILEDTASLHDLQPTPKLFTISANDQEGVRRNVERLQRYLSAKTSAAFSLDLAFTLSAKRS

>AAR90262.1\_polyketide\_synthase\_\_Bipolaris\_maydis\_

PIAIVGMSFRGPGSANNIENLFKMICERES-RTAIPKSR-WNNKAFYHPNFQ-RHGSHNVE-YGHFFHD---  
DISKFDAPFFNMTKEEAALDPAQRLLLESTYEALEN---GGIP---LEKIVGTKTSVFGVGFATDY----TDLLTR--DPESVPMYQCTNSG-  
QSRAMISNRISYFFDLHGPSLTLDTACSSSLVALHLACQSLRAGEAKSAIAAGVNVVNLNHEFMTT--MSMM-----KFL-SPDGRCYAFDER---G-NGYGRGEG-  
FGTVILKP--LDALRDGDTP-IRAVVLRATATNEDGHTP-----GILTLPSSDAQERLIRRTYASAG---LN-FDD---TTLVEAHGTGTQGDIAEARGIAQ-AF-----  
GAPEDRPLIIGSIKSNLGHLEGASGIAAVKAVLMLEQEVILPNQNF-KP-NPRIP--FVDWKLVRATNVQPWD--SS---G-----  
PLRVNSVNSFGYGGANAHVILEDTASLHDLQPTPKLFTISANDQEGVRRNVERLQRYLSAKTSAAFSLDLAFTLSAKRS

>AAR90263.1\_polyketide\_synthase\_\_Bipolaris\_maydis\_

PIAIIGMNMKFGDVAQSFVKLIVSARNV-SKEVPADR-FKI-AFYHPDPN-RLDSIRIR-NAHFMT---  
DPRAFDAPFFNMSHAEASVLDPQQRGLLEGAYRTFEN---AGIP---MESLRTPTSVYCASFSRDG----ETITGR--DFASQSRYHATANG-S--  
SMLSNRISHFFDLGAPSLTVDTACSSGLVALHLGVSILTGESTMSLVCGANTFITPESQAL-ALSNG-----GFL-SVDGKSYSDAK---A-NGYARGEG-  
FGTVILKP--LDALRDGDTP-IRAVVLRATATNEDGHTP-----GILTLPSSDAQERLIRRTYASAG---LN-FDD---TTLVEAHGTGTQGDIAEARGIAQ-AF-----  
RDGRSLDRPLYIGSVKASIGHLEGASGLAGVIKAVLSLEKAVIPPIAMFE-KV-NPAID--AADLQLAFPKEAIPWP--AS---E-----  
VRRASVNSFGYGGANAHVILEDTASLHDLQPTPKLFTISANDQEGVRRNVERLQRYLSAKTSAAFSLDLAFTLSAKRS

>AAR90264.1\_polyketide\_synthase\_\_Bipolaris\_maydis\_

PIAVVGFQFKFPQDVTNAETLWKLIERST-MTEIPKNR-WNIDGFYKENGH-RPGTVKNR-GGHFLSD---  
DPRAFDAPFFSIQPAEAEACMDPQQRLLLESTYHALEN---AGIT---MQDAVGTRTSVHVGCLLQEY----SQISQR--DAQMPGDYRIVGSSGL--  
AMLSNRISYFFDFGSPSMTVDTACSSGLVALHLGVSILTGESTMSLVCGANTFITPESQAL-ALSNG-----GFL-SVDGKSYSDAK---A-NGYARGEG-  
FGTVILKP--LDALRDGDTP-IRAVVLRATATNEDGHTP-----GILTLPSSDAQERLIRRTYASAG---LN-FDD---TTLVEAHGTGTQGDIAEARGIAQ-AF-----  
TPEDPIFVGALKSNMGHPGASGIAGVIKTLVLEKGIHPNVYPE-RI-NPAVT--AAGPNLRFPLEPVTWP-----  
TSGVRRASVNSFGYGGTNAHVVIDDALS-----FLREQG-----

>AAR90265.1\_polyketide\_synthase\_\_Bipolaris\_maydis\_

PIAIVIGLDAKPCDGDSSVQFFDFLIAGRSA-RKVPVSDR-YNADAFWHPDHH-RDGIHASK--QGHFMNS--  
SVKAFDAPFFGITPAEAAALDPAQRLLLESTYHALEN---AGYT---LQELGNTGVYVGSFVYDY--RD-VMIK----DTDVALTYSGTGTV-P--  
STLAGRVAWFFDFRGPFTVDTACSSSVALHQAIVIGLKSRECNLALACGTNVLSPFEGQQ--LNGL-----GVL-SPQGASKSFDKE---A-NGYGRGEG-  
ISVVVLKR--MSDAIRDGDTP-IRAVIRNSGIGHDGK--GA--PLPAPVRESQVNLVRRCYAQAK--ID-PSE---TRLFEAHGTGTNAGDPTEAGAIISD-IF---  
SRSEEEPIYIGALKSNIGHTEGNSVAFSIKAVLTLESIGIIPANAHFK-EV-NHAIP--KKWHFKFPTVATPYP--KT---PSG-----  
VRRVNSVNSFGISGTNAHVVIDARHNGTAFAPQLFVLSAFDQDGVSRKCKAYAEYL--PKMITS-LYNLSYTLARKRS

>AAR90267.1\_polyketide\_synthase\_\_Bipolaris\_maydis\_

PIAICGMALRLPGALKTPAQWFVTLTEKKDA-RAPIPFAR-FDAEAFYSASG--KSGYFNSK--  
NGY YLDDSAEVLGALDTSLFRMSQESERMDPQAKILLELARECFES---AGET----DWRGKDIGTYVGSFGNDW--LE-MAAK---DRLDKNMYKVSQYS-D--  
FLLSNRSLYEDYDLRGPSTIRTACSASLMGLHEACLAIIRNGDCSAAALVGGSNLFWSPDTMAD--MSEQ----GVT-SPNASCRSFDAD---A-DGYARAEA-  
VNLVIYKP--LSAAIKHGNP-IRAIIRGSSLNADGK--TP---GPSMPSSSSQAALIRRAYQNAG--IP-ESE-IIRTAFFVECHATGTATGDPIEATAVGN-VF---G---  
NGGVYIGSVKPNVGHSEGASGITSIIKAVLALENRVIPPNIKFE-TP-NPKIP--FLEKDLKVPDCLGWPF-----KDK---  
LERVSVNFGIGGANAHFILDASAASFLESKWKGLFLITASTSESLEMQTRNLRDYA--LSN-TKAEHGSYTLACRRE

>AAR90269.1\_polyketide\_synthase\_\_Bipolaris\_maydis\_

PIAIVGMGMRLPGNCHNSEAFWDLINQRDG-MIDIPSSR-WNSEGFYDPHG--RPGTTKVN-KGNFLGSI--  
DPADFDSFFSMAAAQIAK VDPQHRVLETTYEALEN---AG----ESNFRGKKGVVYVGMFADDY----VEMQSK--DSEPHEFLSLTGHL-D--  
LFGSNRVSHEFDWTPGSMITKTGCSASLVCLDQAVKALRAGDCDAIVGGANLIMSPALSCA--LVAQ----GVN-SADGICRSFADK---A-TGYGRGEA-  
VSSLVVKR--LSDALADGNP-IRAIIRSTACNDDGKTP-----GITQPNVAHEALIRAAVYRTAGISEED-LNK-----TGFFECHGTGTAVGDPIEVAVAR-VF-----  
GKDGMIIGSVKSNIGHSEGASGNTSVIKAILSMHQIIPNVNFE-TP-NPKIP--WKEANLRVPTCEMKWP--SD--R-----  
LERASVNSFGIGGTNAHVILESAASTEQKPRLSLLFTARSEISLQESINKHADIYI-QKHGSSRLGDIA YTLGTRRE

>AAR90270.1\_polyketide\_synthase\_\_partial\_\_Bipolaris\_maydis\_

PIAIVGSACRFAGGANSPSKLWDLRNPDKI-RSNITDKR-FNANGFYHPDGS-HHGHMNVL-QSYLLEE--  
DTRLFDAEFFGINPVEAKAMDPQQRLLLEVYYESIES--AGLS---IDRLRGSDTAVFAGLMCGDY----EARMLR--DLDQVPTHFATGTS-R--  
AVMSNRVSYFFDWHGSPVITIDTACSSSLVAVHHAVQALRSGDASHAAVACGSNLIFGPEMYVI--ESKL-----KML-SPDLSLRMWDK---A-NGYARGEG-  
VTAVVLKT--LSQALADGNH-IEVIRETGMSNDGA--TP---GITMPSASAQRDLIRSVYRKAG--LD-PESAEDRPQYIEAHGTGTAGDPIEAEALSTAFF----  
GEKMTTPIYTGSIKTVLGHTEGSAGLAALLKVTQAMQNSTVPPNLWFQ-QI-NPKLK--PFYGNLQIPTHALIWP--KP--FGRR---  
PKRASINNFVGGGTNAHAIVESYELASSAVTVSTPFVFAASTESELRSNLAAYATYL-DANPQTNTRDLAYTLRERRS

>AAS57290.1\_polyketide\_synthase\_\_partial\_\_Fusarium\_graminearum\_

----IGVGCRLPGGANLNDLWKLLESERNG-QTEIPKDR-WNADAWFDAYPD-AKQSMVTK--YGYFLQD--  
DISQFQDAKFFGISSAEANMDPQQRLLMTTYEALED---AGIP--VETLRGSNTGVYASIFERSY--DR-MGHK----DLSTIGRTHLNGTG-E--  
SDLSNRVSYCFDLRGPCMTIDTGCSGSLVGLHQACQSLRGESELAALVGGSQLVIQPDVLCI--MSGM-----GML-NPDGKSYAFDSR---G-AGYGRGEG-  
VATIVLKR--LSDAALADGNH-IEVIRETGMSNDGK--TP---GLNTPSPDEAQAALSRVYQEAQ--LN-PAD----TSFVEAHGTGTAGDPIEAEALSTAFF----  
CEGRTDDLYIGSVKTNIGHLEATSGIAGLLKSLILKHGQIPATLNF-KP-KPSLK--LYEKKIKIPSELTKLP--TP---QNG----PPRVSLNSFGYGG-----

>AAS57294.1\_polyketide\_synthase\_\_partial\_\_Fusarium\_graminearum\_

----IGTFCRFHGGANTPSKLWDLLEIKRDV-QSSIPPVR-FNVDAFIAVM-D-KNGCTDVK-KAYLWAE--  
DTRLFDASFFKINPREAEAMDPQQRLLLEAVYEATE---SGLP---MEDLKGSDTAVYVGCMTGYY----HEMLMR--EPQDMPKYMATGTA-R--  
SILSNRISYLFQDWKGPSMTIDTACSSSLVAVYDAVTAALRNGVSRIACAGGVNLIIGPEMMIS--ESKL-----HML-SPTGRSRMWDAS---A-NGYARGEG-  
VAAIMMKT--LSQALADGNH-IEVIRETGMSNDGRTN-----GITLPSDEAQAALSRVYQEAQ--LN-PAD----RCQFFEAHGTGTAGDPIEAEALSTAFF----  
DGSDIVNEPMYVGSVKTAIHLEGCAAGFAGMIKIVAEVKTGIIPNQLFE-TL-NPAVK--PYTSNLKLPVESQPWP--KL---TEGF---  
PRRASVNSFGGGTNVHAIHQFDNSSVNEVICTPLVLSANCELS-----

>AAT28740.1\_FUSS\_\_Fusarium\_verticillioides\_

PIAIIGTSCRFPGGANTPSKLWDLLEIKRDV-QSRIPNDR-FNVDAFYSTNGD-KNGCTDVK-RAYLLSE--  
DIRVFDASFFKINPREAEAMDPQQRLLLEAVYEATE---AGLP---MEDLKGSDTAVYVGCMTGDY----HEMLMR--DPQDMPKYMATGTA-R--  
SILSNRISYLFQDWKGPSMTIDTACSSSLVAVYDAVTAALRNGVSKIACAGGANLILGPEMMIS--ESKL-----HML-SPTGRSRMWDAS---A-NGYARGEG-  
VAAIMMKT--LSQALADGNH-IEVIRETGMSNDGRTN-----GITLPSDEAQAALSRVYQEAQ--LN-PAD----RCQFFEAHGTGTAGDPIEAEALSTAFF----  
TDGDIVSEPMYVGSVKTAIHLEGCAAGLGLIKALEAVKRGVIPPNQLFE-NL-NPALK--PYVSNLRLPTESKPWP--KL---APGS---  
PRRASVNSFGGGTNVHAIHQFDHSSADGIITPLVLSANSDLRLKQIAHFAEAI-EHNDKGEIDRIIFLAQRRS

>AFL91703.1\_ArmB\_\_Armillaria\_mellea\_

PIAICGMSVNMPGA-QSVAKLWEVLEKGINV-VSEVPEHR-FKVSNDYNDPKKKSRTMA---AHTGNFID---  
EPDAFDNKFNFISPREARSMDPQQRLLLEAVYEATE---AGYV---PNSTPTNTFGCYVGVATNDYVQN-----LRNDIDVYYSTGTLR-R--  
AFLSGRISYALQFSGPSIVVDTACSSSLVAVYQACRALMNRDCNAAVAGGVNIGSPDMFLG--LDRG-----HFL-SPTGQCKAFDAS---A-DGYSRSEG-  
CGIFVLKR--LSDAVRNDQ-IRAVIRGVEVNSDGNAY-----SITRPHAPTQENLFTQTLERSG--LD-ASR---ISVVEAHGTGTAGDPIELESIRG-IFAKNRKT--  
NNPLHITSVKANIGHLEAASGAALAKLLMLRHRITPRLISLK-NL-NPRIK-PLASDNVIIDTKQVAVAVPDE-----  
SLPRVALLNFGAAGSNGALLLEEYIPEKIEVSSTFIVGLSAKNEQALVDLRASYIEYLRSPASAVSLADIAATATARRR

>AGI05041.1\_fumagillin\_dodecapentaenoate\_synthase\_\_Aspergillus\_fumigatus\_Af293\_

PIAIVSACRLPGHVNGPHKLWELLQSGGTAVSNEVPQSR-FSSEG-HFDGSG-RPGTMKAL--SGMFIEDI-  
DPAAFDAFFNLTRADAIAMDPQQRLLLEVYECFEN---GGIP---IEKVRGKQIGCYVGSNLGDY--HD-MQMR----DPEQRVSGHAVGTG-R--  
AFLSNRISHFFDLRGSSTFIDTACSSSLVGVVDVACKNLRAAGTLTGAVVAGVNLWLSPEHTEE--RGTM-----RAAYSASGKCHTFDAK---A-DGYCRAEA-  
VNAVYLRK--LSDAVRNDQ-IRAVIRGTASNDSGW--TP---GINSPSAAQAAMIREAYANAGIDSSE-YAE---TGYLECHGTGTAGDPIEAEALSTAFF----  
AHPPASPLIIGSVKSNIGHSEPGAGLSGLIKAMLVVEEGEIPGNPTFL-NP-NPAID--FDNLRVYATRIRIPWP--KE---SSH---  
YRRASVNSFGGGTNAHVILESAASTEQKPRLSLLFTARSEISLQESINKHADIYI-QKHGSSRLGDIA YTLGTRRE

>AIA58899.1\_HRPKS\_\_Penicillium\_brefeldianum\_

PIAVVGIACRLPGHSSTPKKLWDFLERGGIA-ANDTPSTR-FNLAA-HHDGSK-KPKMTRTP--GGMFIEDA-  
DPRDFDAGFFGIGSADAAAMDPQQRLLLEVYECLEN---SGVP---FEKLYGAQVACHVGSYAVDY--DA-IQAR----DPEDRAPGAVVIG-R--  
AMLSNRISHFFDLRGSSTFIDTACSSSLVGLDVAACRYLHTGEVDGAIIGGANMYFSPEHNLN--TGAM-----SVANSLSGRCHTFDVK---A-DGYCKAEA-  
INCVYLRK--LSDAVRNDQ-IRAVIRGTASNDSGW--TP---GIASPSAAQAAMIREAYANAGIDSSE-YAE---TGYLECHGTGTAGDPIEAEALSTAFF----  
SAKPEAPLYIGSVKSNIGHSEPAAGISGLIKALSIEKDLIPGNPTFI-TP-TPKID--FEGLKLPQSRANRRWP-----AAP---  
FKRASVNSFGYGGNAHVIVVEPKV--VAGGRLQLLVLSANDEASLRANATTLKNYL--TNPNISLGDLSHTLSERRS

>AJG44381.1\_MpaC\_Penicillium\_brevicompactum\_

PIAITGMACRYPNA-DTLAQLWELLELGRCT-VKSPPESRFHMSDLQREPCKGP-----F-WGHFLE---  
RPDVFDRHFFNISAREAESMDPQQRVALQVAYEAMES--AGYLKWQPNRLSQ-DIGCYVGVGSEDTENV-----ASRNANAFSITGTL-Q--  
SFIAGRISHHFVGSWSPSISLDTACSSAAVAIHLACKALQTNDCCKIALAGGVNLTNPRVYQN--LSAA----SFL-SPSGACKPFDAS---A-DGYCRGEG-  
AGLFLVLRP--LQDAIDNGDP-ILGVIAGS AVNQGSSNNS----PITVPDAEAQRSLYKAMSLAG---VS-PDE----VTYVEAHGTGTQVGDPIELDSLRRITFG---  
GPHRRNMLHIGSIKGNIGHTETSSGAAGLLKTLMLQQQRIPRQANFN-QL-NPKVK-SLTPDRLVIASESTEWV--ST-----  
KRVAMVSNYGASGSNAALIVKEHAPAPEYIQNKLAYNLMAMKQNRDLPLNL-----

>BAC20564.1\_polyketide\_synthase\_Penicillium\_citrinum\_

PIVVVVGSGCRFPGGVNTPSKLLWELLKEPRDV-QTKIPKER-FDVDTFYSPDGT-HPGRTNAP-FAYLLQE---  
DLRGFDASFFNIQAAGEAETIDPQQRLLLETVEAVSN--AGLR---IQGLQGSSTAVYVGMTHDY----ETIVTR--ELDSIPTYSATGVA-V--  
SVASNRVSYFFDWHGSPMTIDTACSSSLAAVHLAVQQLRTGESTMAVAAGANLILGPMTFVM--ESKL----NML-SPNGRSRMWDAA---A-DGYARGEG-  
VCSVLKLT--LSQALRDGDS-ILCVIRETGINQDGRIT-----GITMPNHSJAQELIRATYAKAG--LD-  
ITNPQERCQFFEAGHTGTPAGDPQEAIAIATFFGHKDGTEKDELFGVGSIKTVLGHTEGTAGIAGLMKASFAVRNGVIPPNNLFE-KI-SPRVA--  
PFYTHLKIATEATEWPIVAP-----GQPRRVSVNSFGFGGTNAHAIIEEYMATSDADACSLPLVLSKSKQRSMKATLENMLQFLETHDD-  
VDMHDIAYTLLEKRS

>BAC20566.1\_polyketide\_synthase\_Penicillium\_citrinum\_

PIAIVGMGCRFAGDATSPQKLWEMVERGSSA-WSKVPSSR-FNVRGVYHPNGE-RVGSTHVK-GGHFIDE---  
DPALFDDAFAFFNMTEVASCMDPQYRLMLEVVYESLES---AGIT---IDGMAGSNTSVFVGGVMYHDY----QDLSNR--DPETVPRYFITGNS-G--  
TMLSNRISHFYDLRGPSVTVDTACSSLTALHLACQSLRTGESDTAIVIGANLLNPDVFTV--MSNL----GFL-SPDGISYFDPR---A-NGYGRGEG-  
IAALVIKA--LPNALRDQDP-IRAVIRETALNQDGKTP-----AITAPSDVAQKSLIQECYDKAG--LD-MSL----TSYVEAHGTGTPTGDPLEISAISA-AF-----  
KGHPLHLGSKVANIGHTEASGLASIIKVALALEKGLIPPANRFL-----QKNSKMLMDQKNIKIPMSAQDWVPVKDG-----  
TRRASVNVFVGGSNAHVLESYDRVEDGSKQRIYVVRKDEQACRRTIASLRDYIKSVADIPFLASLAYTLGSRRS

>BAD83684.1\_PKS\_N\_polyketide\_synthase\_for\_alternapyrone\_biosynthesis\_Alternaria\_solani\_

PVAIIGIARFGPDARDPEAFYRMLVEGRNA-RTEIPKDR-YNVDAFYHPDSE-RLGSIQQR-HAHFLQ---  
DFKVFDAFFSITPKEAKAMPDTHRILLEATYEGFEN---AGLS---LEKVSQTQTSYIGTFTADF----PNLQAR--DNEGPSIYHATGMS-A--  
SLASNRISWYFNLRGSPSLTVDTACSSSLTAFLHLACQSLRTGCEAEMSVVGGANLMMFGPDMISL--LGAA----KIL-SPEGKSKMWDAN---A-NGFARGEG-  
FGVTILKP--LDAALRDGDN-IRAVVLATAANEDGHTP-----GISLPNSEAQOELIRRAYQIAG--VD-PAE---TAYVEAHGTGTQAGDPLEARAILK-  
TIGSVEGR--KSDLVGVSKTNIGHLEGAAGVAGIKAALTVRGMIPPNLWFE-KL-NPEID---LPDNVKIASKLTPW-----  
HSGPRRASINSFGFGGANAHAILEDAAASLRDVPKPLFVLSHSDQEGVKRSAERLQEYLASKTSTSFNLNLAAYTLAKRT

>BAJ09789.1\_polyketide\_synthase\_Alternaria\_solani\_

PIAIVGMGCRVPGGVRDASSLWELLKNKRSR-YREFGDHR-FSRKGFHHPNSE-HPGT-VAT-EGGFLAE--  
DPRLFDDHAFFGIGSLEVEDMPSQRKLLLEVVEAFEN---SGEP---WDSFSGSTTGTVFVGNFSSDH----LIQGR--DTDHPRPYASVGTG-T--  
SILASNRVNYFNLRGSPSLTVDTACSSMYALHLAISAIRNGDCDAIIVAASNTIHPSTXLM--MTKL----GVL-SPTSTSHTFDSS---A-DGYARGEG-FSALYLKR-  
-MSTAVDGDYP-IRALVRGSALNANGR--TG---GITHPGREGQEA VIRKAYENAGN--LP-MKD----TTFECHGTGTPVGDPIEISAIGN-VF---  
GSTPEKPLLVGSIKTNIGHTEPASAIAGIMKVVLALENGFIPPSIGIK-KL-NPKLD--LKGGRINILTENTPWP--DG---R-----  
VRRASVNSFGYGGANGHCHIDDVRTYKKRTANTSIGHINGHTNGHTNGHTNGHTNGH--TNGHTNGHTNGAH-----

>BAQ21221.1\_polyketide\_synthase\_Oryzias\_latipes\_

GIAVVMGMCNFPGG-EGLENFWKVLLEGQNC-VVDIPSER-FDTSFWSADAT-KPGKTQTT-RAALID---  
GFNEFDHKKFFGISEAEADVMDPQKLLQCSYRALED---AGTS---IESISGRTGVYVGLMNRDY--EM-LRNN----NPNTISHYNATGTA-T--  
SVAANRISYTFDLQGPSFVDTACSSSLVALHVACQAMRLGDCCEMALCGGVNCHPEPRVFVA--LSKA----KMT-SPEGTSKPFSIR---A-DGYARGEG-  
CGVLLKLP--LRSKRDRNK-IWGIHRTAINQDGRSVTP---ITKPSKVOQEELLRGIYS-----IAD---VQYIEAHGTGTPAGDTTEAGSISD-AI---  
AEPGSKTLMVGSVKGNIGHTESAAGVAGVIVKLVLLMMKHETVPSVYFS-DD-SAGVD--MRALKLRVPIKAEKWE--AA---G---  
PHGRVAGVNSFGFGGTNSHVVLREYTNATWL---KVCVLSAASEKSLILTINDTHRRLL---NQVDLRGLSYTSACGRS

>CAB04244.2\_Fatty\_Acid\_Synthase\_Caenorhabditis\_elegans\_

DIVISGVSGRFPRC-DNVKMFDMMLAGEDL---VTEDSLRWTPGFCDLPK--RHGKLL-----  
VLNKFDAFFQVTPKQANFMDPQVRLLLEASWEAMVD---AGIN---PTDLRGSKTGVFVGCASSET----SGMLTQ--DPDVTGTGTLTGCV-R--  
SMFSNRISYTFDLQGPSFVDTACSSSLVALHVACQAMRLGDCCEMALCGGVNCHPEPRVFVA--LSKA----KMT-SPEGTSKPFSIR---A-DGYARGEG-  
VAAIFIQR--KKKAQR---LYATVVHAKSNTDGHKEHG---ITFPSGERQAQLLQEVYSEAG---ID-PNS---VYVEAHGTGTVKVPDQEA NAICE-VF---  
CSKRTDSSLIGSVKSNMGAEPASGVCSLTKILLSIERQLIPPNLHYN-TP-NQYIP-GLTDGRGLKVVEPTALP-----  
GGLIGINSFGFGGNSHVLKAADHPITPHPTKLVTYCGRTEQEA VENIFTEIESNK-DD---LYLQALLANQANMPA

>CAC44633.1\_polyketide\_synthase\_partial\_Fusarium\_fujikuroi\_

PIAIGSACRFPDSSPSKLLWLLKSPRDL-LTKVPPNR-YNADAFYHADSK-HHGTTNVR-HSYFLNE---  
DPARFDDNFFNIQPEAEADPQQRLLMEVVYQGLCA---SGQT---IEGLRGSPTAVYVGMCDW----SGIITR--DLEVFPQYGATGMA-R--  
SIMSNRISYTFDLQGPSFVDTACSSSLVALHVACQAMRLGDCCEMALCGGVNCHPEPRVFVA--LSKA----KMT-SPEGTSKPFSIR---A-DGYARGEG-  
IAAVVLLKLP--LSAAIRDNDH-IDCIIRATGVNQDGR--TP---GLTMPSATAQADLIRSTYARAG--LD-INKPEDRPQFFHAHGTGTPAGDPREAEASTVRSI---  
PDVKDDKLYVGSIKTVLGHTEGTAGLASLIGTALAIQNKTIIPNMHFD-VL-NPKIK--PFYDNLEVPKAIAPW--ET---HKGQ---  
PRRASINSFGFGGTNAHAIIEAYEPDSAPGLFSPLTFSASSEPSLRSLSSYSDDL-KSNPDLKDLAYTLQTRRS

>CAG28797.1\_polyketide\_synthase/peptide\_synthetase\_Magnaporthe\_grisea\_

PIAIGSGCKFPGGSTTPSKLLWLLKDPKDI-VSEIRPDR-FDVVKYFHPDHK-HHGTSNVR-HSYFLNE---  
NFKHFDKFFGIRPQEAAMADPQQRFLLETVEYESLEA---AGIT---ISDLKGSQAGVFGVMGVDY----SELLSQ--DIDAFPTYFAPGTA-R--  
SILSNRISYTFDLHGSPVDTACSSSLVALHVACQSLRLGETPVAIVCGANLLTPGMAQYIA--ESKL----QML-SPNGRSRMWDAS---A-DGYARGEG-  
FASIVLKP--LSVALANGDH-IECIHRETGCNQDGRIT-----GITMPSLAQCKLIQETYKRAAG--LD-  
LSKSSDRPQYFEAHGTGTPAGDPVEAEAIATAFFGPESGFSHPDKLYVGSVKTVIGHTEGTAGLAGLIKASLAMKAKSIPPNNLHLE-RV-NPAVQ--

PFYGNLEIPTRLMDWP--EP---APGQ----PLRASVNSFGFGGANAHVILESYTPTAAAGPVFSPFVFSASSDKALASMLSAYS DYL-  
SLNPTVDLRSVAYTLSQHR

>CAG29113.1\_TPA\_\_putative\_polyketide\_synthase\_\_Magnaporthe\_oryzae\_7015\_

PIAVVGTGCRFPGGANSKSLWEILEKPRGL-LKKVPAER-FDVSDFYHPDGS-FHGRNAA-NAYFLDQ---  
NIRAFDANFFNIQHHEAEVTDPOHRLLETVYEALAT---AGLR---VEDLRGSSAVYCGQMMNDY----KDLVNF--DQDRLPTYTATGTA-A--  
SILSNRVSYFFDWHGSPMTIDTACSSSLVAVHHA VQQLRSGSSKVAIAAGANLILGPVPLIV--ESKM-----NML-SPTGRSSMWDEK---A-NGYAR-EG-  
VAAVVLKT--LSQALSDGDN-IECVIRETGVNQDGR--TP---GITMPHQAEALIRETYAAAG---LD-  
LSRAEDRCQYFEAHGTGTPAGDPQEAEAISRFFGHGERPPREEPLYVGSIKTVIGHTEGTAGVAGLIKASLAMQNRITIPNMHFH-KL-SPKVA--  
PFYQNLHVPTEAQPWP--EL---APGV---PMRASVNSFGFGGTNAHAILEAYPNQRSSAVPIWPIPIISANSELSLKATMQDLLQYL-  
KSASGVRVQDLAWTLTNRSS

>CBX87032.1\_BcBOA9\_protein\_\_Botrytis\_cinerea\_B05.10\_

PV AIGMGCRFPDSDTPEDFWKMLAEERSG-LSRPPLSR-WNIDGFHANKA--RPGSLTPE-GGYFINE---  
DIWKFDPAFFGIVQEEAKAMDPPQRKLLCEVYESFES---GGIT---LSQLSGSNTGCYIGNFTSDY----YLQGHR--DHNNPKPYSLLGSG-Y--  
TIISNRVSYLFDLCGP-----RALQKEIDAAVVGTTNMLLAVETQMS--TDKV-----GVL-SATSTCHTFDES---A-DGYGRAEG-VGAIFLKR--  
LSDAIRDNDP-IRGVIRGTATNANGKTS----GITQPSAKGHETVMRTAYEFAG---LD-PRD----TSYFETHGTGTQVGDPIEIKGVNFF--  
NGTDRQKLLVGSVKTNVGHSEAAASALASIIK VCLAMEKRTIPATIGIK-KL-NPKID--FKGGRIEVVQKMTWPWP--KG---FS-----  
VCRASINSFGYGGANATAIVEAADSRAVRSSEFLLLSAHADISTLKSNIERCRDVA-ED---YNILDLAYTLGCRRS

>EAA49993.1\_hypothetical\_protein\_MG03752.4\_\_Magnaporthe\_grisea\_7015\_

PV AIVGMACRLPGSVSDPEAFYELCCLGRSG-WSEIPSHR-FSKEGYHHPND-RLGCFNPV-GGCFLESE---  
DIGLFDAPFFKITEREAVAMDPOHRLILECTYEALEN---AGIP---MHSIAGRNVGCFAGGSFTDY----ELNLR--DLETQPMHQSTGNA-P--  
TMMANRVSYFFDLRGPSTVETACSSSLTALHLAMQSLRCGDSSLVVLASSHLNVMDFHVA--MSSN-----GLL-SGDGRSYAFDSR---A-NGFGRGEG-  
AGV VILKP--LADALRDGDN-IRALVVGSGVNDGRTN----GITMPNGESQLDMRKVYADNG--LD-PRD---CGYVEAHGTGTQVGDPLEMKALHD-  
MFWEDR--SPRQLLVGSVKTNVGHLEGASGIVSLIKSAMMLERGYVLPNHDFR-EG-NKEIP--FDEWGVKVPKVMWPWP--RG-----  
KKYISINSFGYGGANAHVAAPPR-----FRLPGEGLSLEE-----

>EAA58609.1\_hypothetical\_protein\_AN6791.2\_\_Aspergillus\_nidulans\_FGSC\_A4\_

PIAIVGLSCKFAGEASTPDRLEWMLAAGRSA-WSEIPSR-FNLKGA YHPSAD-RTNTVHVR--GGHFLEQ--  
DLGLFDAQFFSFAETAASMDPQIRLQLESVYEALEN---AGIT---LPDVAGSNTAVYAAVSRDY--RD-GIIR----DEDRLPRFLTGTG-D--  
AMFSNRVSHFFDLRGPSTLDTGCSGGLVALHEGVKSLRTGESDMALISGEGLTDEGRFF-----SPDGKSYAFDSR---A-NGYGRGEG-IATIVIKR--  
LSDAIIAGDP-IRAVIRESGLNQDQK--TE--TITPSEEQAVALMRDCYRRAG--LD-YAD---TQYLEAHGTGTSTGDPICRAIAT-VF---  
KDSSEQPLRIGSVKTNVGHTEAASGLASLIKVVMALEKGIKIPINSIFE-KP-NPKIA--LDEWNLRVVTTLEDWP--AG---PGG-----  
VRRASINNSFGYGGTNAHLIVESQAASATNLDSDQIFVFSARDKQACVNMVNNLKKYL--RQNAL-LQRVAYTLGQR--

>EAA59818.1\_hypothetical\_protein\_AN3610.2\_\_Aspergillus\_nidulans\_FGSC\_A4\_

PIAIVGLGCRFPGGADTPEKLWQLAYEGRQC-WEEVPSNR-YNWHAFHHPDPE-ARGTHNAR-GGFFLQO---  
DPAVFDANFFFAISAAEAIDPQRLLEVSYEALEN---AGMP---LEAIRGTQGTGVYVALVSRDY----DRMIYK--DPSQIPKYHLTGCG-D--  
ATACGRISYTFDLKGPVSMGTGCSGSMVALHLACQALRLGETNAIVAGTNLLGPDMTIA--MSAL-----HMI-NENGRCPYFDSR--G-AGYGRAEG-  
VAALVLRK--QADAVRDGDP-IRAVIRNTGINQDQKTN----GIMLPSEAAQQLTSTLYRQAG--LD-PNY---VCYIEAHGTGTQAGDAAEVTSIKQ-  
VFASAART-RERPLFLGSIKANLGHSESTSLAGVIKTVIALENA TIPPLAAL-EL-KPDLHSLESTKIIPKVPVSWP--HE---G-----  
TRLASVNSFGYGGTNAHVILESAPEPNEDGRPQLFIVSAKSRVLEAAIYNVRDWW-SRHGAIKRQELVKTLCRRS

>EAA61508.1\_hypothetical\_protein\_AN9217.2\_\_Aspergillus\_nidulans\_FGSC\_A4\_

PIAIVGMAARFSGEATNPSKLDMMVQGRGTG-HSAVPENR-FDAEAWHHPHSE-RRGTIQPR-SGFFLRE---  
DPAVFDAPFFSMTAKEAA GMDPMQRKLEISYEFEN---AGIP---ITKLPGTATGVYSGVMNTDY----ELMTAG--DPMQLPQNAASGTS-R--  
AMLANRISYFFDLRGPSTLDTACSSSLVALHLACQSLQAGETDQALVTVGNLILAPNFISQ--LSSM-----HML-SPDGKSHSFDNR--A-NGYARGEA-  
LAAVVVKP--LYQALADGDT-IRAVIRGSGANQDQKTV----GITIPNQAQAEIRKTYATAG--LG-LEQ---TGYFEAHGTGTPVGDPIELSAIGT-SF---  
GESQNCPLFVGSVKTNVGHTEGAAGLAGVKTVLALEAGIIPPLADFQ-EL-NEKLR--LEEWKALPLKATPWP--MP--G-----  
LRRASVNSFGYGGANAHVILDDAYHDSGEGQSSKLLLSA YDGAGIKRTEASWNSHL-ADILAMGMNDLAYTSLDRRT

>EAA63960.1\_hypothetical\_protein\_AN1784.2\_\_Aspergillus\_nidulans\_FGSC\_A4\_

PIAIIGTGCRPLPGSSSRSLWTLKKNRNV-ASETPGDR-FDINAFYHEDPG-YPGTTNSK-EAYYISD---  
DPRPFDAPFFNISATEAESIDPQRQLLETVYESLES---AGLR---LDALQGSSTGIFCGVMNNDW----GELQSA--DYKSLPQYLATGAA-R--  
SIANRISYFFDWHGSPVVDTACSSSMVALHHA VTLAQNECTLALATGTNLIQAPNFIS--TTKI-----QML-SPTGRSRMWDAN---A-DGYARGEG-  
VISIVLKR--LSDAIRDGD-IECVIRATGTNQDGRTM----GLTMPSSVSLQLIQSTYARAG--LD-  
PRRVQDRQYFEAHGTGTLAGDPQEA AAIHHAFFGPPASPDNDILLVGSVKT VVGHTEGTAGLAGHIKASLNQHGLISPNLLEF-EL-NPALE--  
PFASHLKVVTELTWPWP--SL--PTGA---PRRVSVNSFGYGGTNAHAILESYDAGQSLTAALLPFVFAASEGSLA AVLNSYAGYL-  
KGGPALNLVDFAVTLRRTS

>EAA64652.1\_hypothetical\_protein\_AN2547.2\_\_Aspergillus\_nidulans\_FGSC\_A4\_

PIAVIGICRLSGSATDVSGLWDMKSGRSG-WTPGPGTR-FNMKAFQDPTGT-RSGTTNAT-GGHFIRE---  
DISKFDATFFGINPVEAQAMDPOQRLLMLEVA YEAFEN---AGIT---MDALWGSNTGVYVQWASDY----HEIATR--DIERPPLYLVTGTG-P--  
AITSNRVSYVFNLRGSPFTVDTGCSSSLVALHQA VLSLRNRETTQCFVGGVNLDDPQRFHY--QSRL-----KMF-SKDGRSFPFDAR---A-NGYGRGEG-  
VTGVVLRK--LSVALRDGDP-VRAVIRNSVLNQDGR--TP---GISVPSAVAQKEAIIIRAYRQAK--LDLYAD-----YVEAHGTGTQVGDPIETSAIAAALT-----  
SPSRPLPGSIKGNIGHTESAAGLAGLIKSVLLENGMIPPQVNYE-TT-NPDIH--LEEWNLRIPTKLERQT-----  
LRRISLNSFGYGGTNAHVILDAHAHELHYHSEKPRVFMVSGASEKACQRVCARLARYL-VVNHRRALLARLAHTLAKQSI

>EAA67034.1\_hypothetical\_protein\_AN8412.2\_\_Aspergillus\_nidulans\_FGSC\_A4\_

LIAIVGSACRFPQSDSPSKLWTRLKEPIDL-RKTFPPQR-LNLARFYHPDGE-HHGSTDVDR-GTSYLLSE--  
DPRQFDASFFNINPREAEGMDPQRLLETAFAEALAE---AGYS---LEAMNGSKTSVHVGVMSNSDF----SNIQLR--DPEVLPTYNATGTA-I--  
SILSNRLSYFFNLKGPSVTIDTACSSSLVALHQA VQGLRAGDATAAIVAGANLIFDPAMYIA--ESSL----HML-SPDSCSRMWKDK---A-NGYARGEG-  
VGVVLVLPK--LSRAIMDGDH-VEAVIRSTGVNSDGRK----GITMPNAESQTELIRQTYRDAG--LDPIRD--  
RCQYFECHGTGTATGDPPEARVHDAFFPTETRTIPDGKLYVGSVKTIHGLEGCAGIAGVLAIKNRITIPPNMHFH-EP-NPRVI--PFCDRLEIPTVPIWPW-  
-DT---GRS----PLRASINSFGGTTNAHAIIEGYDAITPDDLFIGLPLFSANSSSLVANVKNMAERI-RSDPSIDLESLLVWTLYARRS

>EAA67213.1\_hypothetical\_protein\_FG02396.1\_Gibberella\_zeae\_PH1\_

-VAIVGLACRFPGDATSPSKFWDLLKSGKDA-YSET-TDR-YNAQAFYHPNSK-RQNVLPVT--GGHFLKQ--  
DPHFVDAFAFFNITAAEAISLDPKQRIALEVA YEAFEN---AGKP---LKQVAGTTTACFVGSMSDY--RD-AVVR----DFAHNPKYHVLGTC-E--  
EMLIANRISHFFDLHMGPSATVHTACSSSLVAIHLACQSLSGDAEMALAGVGMILTPDGMTQ--LNNL----GFL-NPEGHSRSDFKD---A-GGYGRGEG-  
CGILVLKK--LDKAIQDGDN-IRAVIRASGVNSDGV--TQ--GVTMPSSEAAALIKHVYETRQ--LD-YGA---TQYVEAHGTGTAKADPVETGAIHR-TI---  
GQSKNRKLW-----IGHLEAAAGVASVIKGVLA MENSLIPPNIHFA-SP-NPEIP--LDEWNMAVPTKLPWP-----AAR-----  
TKRMSVNSFGMGGTNGHVLEAFNSYQPAHNGKRLFTFSSHDQAGLDRVSKSLVDHL--DSLQ-----

>EAA69154.1\_hypothetical\_protein\_FG01790.1\_Gibberella\_zeae\_PH1\_

PIAICGMSVRLPGGLHSPQDLWEFLVSKGDA-RGPVPESR-YNASSYWSEKM--KPGTVKQ-YGYFLDESI-  
DIASVDTSFMTMRKDEVGKADPQQRMLLEVARECLE---AG----EFDWKGRIPIGCFMGSFGEDW----VEMFAK--EAQQYGIYRVMGYG-D--  
EMLIANRISHFFDLHMGPSATVHTACSSSLVAIHLACQSLSGDAEMALAGVGMILTPDGMTQ--LNNL----GFL-NPEGHSRSDFKD---A-GGYGRGEG-  
ISAIKVPK--LSAAIRDGNP-IRAVIRSTASNSDGRGTAG---GIQVNDIAQETLIRRAYKMGAG---IDDYSQ---TAFVECHGTGTAGDPIETKAVGR-VF-----  
GPSGGVLIGSVKPNLGHSEGASGLTSLIKAVMALENRTIPPNIKLS-QP-NPAIP--WTSCGLSVPTPEPTWP--SS---K-----  
HERISVNSFGIGGTNAHVIIIDSACSVGRSATAPQLLVFSANGTDSLRLMITNYENYA-EKNPE-KIDDLAFTLGHKRE

>EAA69820.1\_hypothetical\_protein\_FG10548.1\_Gibberella\_zeae\_PH1\_

PIAVVIGICRFPNGSSNPEALWKLSDARSC-YSKVPPDR-YNV DGRHPS-N-KLNTTIAE--GAHFLSE--  
NIAAFDAFFNIAPIDAKSMDPQQRMLLEVYEGLES---AGIK---MEDTTGSDTSCYVGTFTRDW--SD-MLMR----DPETAPKYSAGIG-S--  
GMQANRISYFFNLHGPSLTLDTCSSSLVALHLACQSLSGDAEMALAGVGMILTPDGMTQ--LNNL----GFL-NPEGHSRSDFKD---A-GGYGRGEG-  
IAAVILKS--LDQAVRDRDP-IRAVIRGTGINHDGH--TP---GITLPSASAQADLISSVYKKSQ--LD-YDD---TMYFEAHGTGTAAAGDSVELRAIGA-SV----  
TKDSSKTLVVGSIKSNIGHTEGAAGLAAFIKAVLVEKGLIPRNIHLN-NP-NPRIIP--FEELKIQVPTVEIPWP-----TPG-----  
VRRASVNSFGYGGTNAHAILDDASSFKETTNRKLFVFSAAHEESAALNMKQRYATHL--EEEASYLDRLAY-----

>EAA71995.1\_hypothetical\_protein\_FG08795.1\_Gibberella\_zeae\_PH1\_

DIAVVGIGLRFPGDASSPEELWVKVLGERGESQ-WSEFPKDR-LNIDGYHPGGD-RQGSISFR--GAHFIKS--  
DFAAFDASFFVAVAEADAKAIDPQQRILLEASYEALEN---AGIR---KEDVDGTDAAVYVGSFVKDY--EQ-VCLR----DPDWQPQY AATGNG-I--  
AIMANRISYFFNLHGPSLTLDTCSSSLVALHLACQSLSGDAEMALAGVGMILTPDGMTQ--LNNL----GFL-NPEGHSRSDFKD---A-GGYGRGEG-  
IGVVMVKR--LSDALRNDT-IRAVIRATKVNQDGH--TTALKGITLPSKEAQV ANIHSVYESAG---LD-FSQ---TGYVECHGTGTAKAGDWRELKAISE-SL---  
GSGIDNPVVGSLKPNIGHLEGAAGVAGLIKGVLTLEHAKIPPNIHLN-NP-NPDIID--FKNWVKVPTKLLDWP-----LPG-----  
LRRVSVNCFGFGGTNAHVIMDEAPR-----QLFLFSAHERSGVQRVMESHLPYL--KSKTF-LRDYSYTLGCRRS

>EAA73063.1\_hypothetical\_protein\_FG08208.1\_Gibberella\_zeae\_PH1\_

PIAVVGMSCRPLPGDATDTQKLWELITKGRSA-WSKVPTDR-WNQEAFHDPAAEGKPR-TSTDGGHFLKD--  
DIAAFDASFFGNPIEATAMPDQQRLLVLEIAYEAFEN---AGLT---LQQLSGSNTGVYVGLWASDY----QEMLLR--DIDFPPIYQASGVG-A--  
AIMANRISYFFNLHGPSLTLDTCSSSLVALHLACQSLSGDAEMALAGVGMILTPDGMTQ--LNNL----GFL-NPEGHSRSDFKD---A-GGYGRGEG-  
CSGVVLMK--LSKAQKQGF-IRAVIRNSVANQDQKTN----GITVPSAAAQSAIEKAYAVQV--LT-PYA----DYVEAHGTGTAVGDPPIEKAKIAK-VL--  
GAGRQSDSPLPIGSLKANIGHTESAAGLGLVKA VLMLENMIPPQVNYE-KP-NPEID--LDALNLRIPISLENK-----  
LKRISVNSFGYGGTNAHVIVDAADAKDTRLVREQLFVLSAASEKSSQDLVLNVAKYLESKADAALLSRLAYTLRRTV

>NP\_001012687.1\_fatty\_acid\_synthase\_Bos\_taurus\_

EVVITGMSGKLPES-ENLEEFWANLIGGVDM---VTDDRRWKAGLYGLPRR--GKLGK-----  
DLSRFDASFFGVHPKQAHNMDPQLRLLLEVTYEAIVD---AGIN---PASIRGTNTGVVWVGVSGSEA----SEALSR--DPETLVGYSMVGCQ-R--  
AMLANRISYFFFDKGPSITIDTACSSLLALQSA YQAIQGDCEMAMVGGVGNRLKPNQSVQ--FMKL----GML-SPEGTCKFFSDA---G-NGYCRAGA-  
VMAILTK--KSLARR-----VYATILNAGTNTDGCKEKG---VTFPSGEAQEQLISSLYKPAG--LD-PET---LEYVEAHGTGTAVGDPQELNGIVQ-AL---  
CGTRQSPRIGSTKSNMGHPEPASGLAALAKVLLSLEHGLWAPNLHFH-NP-NPKIP-ALQDGRQVVDRLPLV-----  
GGNVGINSFGFGGNSVHVILQPNQAPHAALPRLLRASGRTLEGVQGLLELGLQHS-QN--LAFVSMNLNDIATPSP

>NP\_001041530.1\_uncharacterized\_protein\_LOC10000781\_Danio\_erio\_

EIAIVGVGCHFPGG-EGLENFWRVLLLEGKNC-AVQIPNDR-FNLSQWYDPEES-KAGKTYTA-KAALID---  
GLNAFDHKKFFGITEAESLMDPQHKLQLCTYRALED---AGIP---MEKASGTRTGVYVGLMNRDF--ELATVRN---NPKHISHTTGTGVA-M--  
SIAANRISYFFNFTGPSVAIDCACSSSLVALHFACQAIQGDCEMAMVGGVGNRLKPNQSVQ--FMKL----GML-SPEGTCKFFSDA---G-NGYCRAGA-  
CGVVLKPK--LKRALEDHHD-IWGVIGKTA VNVQDGHVSP---ITKPSMVQEQEELLRKIYST-E---AD-LCS---VQYIEAHGTGTAVGDPVEAGSMK-VI---  
AKQKSGPLIGSVKSNIGHTESAAGVAGLIKVLLMMQHETIVPSLFYS-KE-NSSID--LKSLNMNIPTRVQKWI--SN---N-----  
RAGRIAGINNFVGGTNAHIVKQYVQSPISKSCQYFVVSAASEKSMRNIIRDADQI--GAGKSDLQSLLYTSACRRS

>NP\_001093400.1\_fatty\_acid\_synthase\_Sus\_scrofa\_

EVVIAGMSGKLPES-ENLEEFWANLIGGVDM---VTADRRWKAGLYGLPR--RMGKLGK-----  
DLSRFDASFFGVHKSQANTMDPQLRMLLEVYEAIVD---GGIN---PASLRGTSTGVVWVGVSSSDA----SEALSR--DPETLVGYSMIGCQ-R--  
AMMANRISYFFFDKGPSITIDTACSSLLALQSA YQAIQGDCEMAMVGGVGNRLKPNQSVQ--FMKL----GML-SQDGTCKRFFSDA---G-TGYCRAEA-  
VVAVLLTK--KSLARR-----VYATILNAGTNTDGSKSEQ---VTFPSGDVQEQLIRSLYAPAG--PD-PES---LEYIEAHGTGTAVGDPQELNGIVN-AL---  
CATRREPLIGSTKSNMGHPEPASVAAALIKVLLSLEHGLWAPNLHYH-TP-NPEIP-ALQDGRQVVDRLPIR-----  
GGNVGINSFGFGGNSVHVILQPNRPAQHAALPRLLQASGRTLEAVQTLLEQLRHS-RD---LAFVGMNLNIAAVSP

>NP\_001137778.2\_fatty\_acid\_synthase\_1\_iform\_C\_Drosophila\_melanogaster\_

EIAITGFSGRLPES-STIEEFKQNLFDGVDM---VNDDPRRWERGLYGLPD---RIGKPKDS-----DLENFDQQFFGVHQQKAECDMDPLLRMLLELTHEAIID---  
AGLN---PSDLRGSRTGVYIGVSNSET----EQHWCS--DADRNVNGYGLTGCA-R--  
AMFANRISFTFDFKGPSYSDTACSSSLYALEQAFSDMREGKVDNALVAGAGLILKPTMSLQ--FKRL----NML-SPDGSKAFDES---G-NGYVRS-DG-  
CVVLLQR--TSAARR----VYASILNVRTNTDGFKEQG---ITYPIGMQNRILIRETYEEIG---LN-PAD---VYVVEAHGTGTVGDPQEVSNTD-FF---  
CKDRTPPLIGSVKSNMGHSEPASGVCSVAKILIAMEEGVIPGNLHYN-KP-NPDLV-GLVDGRLKVVDRLNPWN-----  
GGIIGLSNFGFGGANAHVILKSNPKLTPKDGALKVVLASGRTEFAVEQLLESASTNA-DDDEYQLINEIHSKAIPNH

>NP\_001239013.1\_polyketide\_synthase\_2\_\_Strongylocentrotus\_purpuratus\_

KVAIVGIGCRYANGINGVRFWEMLAKGMDC-TTPPSDR-FDSSFLLFPGSK-IQGMKYNK-CAGYLSQ--  
NPEHFRDQFFRISPEEANHLDPQIRMLLEVVWESLQD---AGIP---AHSARGSKTVYMGVASEY--GV-LIGM---PNDNINQYNTSGTN-S--  
CMTANRVSYEFDFRGPSTVDTACSSSMYSVHLACEALKNGQCEMAVAGVNVNLLPITSIG--FCQA-----GML-APDGCKKSFDS---A-DGYARREG-  
VGA VILKP--LQRAIDDGDR-IYGVIRGGAIANR--TP---GIALPSYDQVSLIENAYKNAN---TL-PEE---VYVVEAHGTGTVGDRTEASAIGE-AM---  
GLVEQPPLYLGSVKSNFGHSEGAAGIAGVKAALCLYHEIQPKVVFHR-SG-NESVD--FESLNIRVPGELTRWP-----KAA-----  
KLVGCSSEFGFGGANAHVILEG---NERDSGKPSILFLSAASKDALKHLEEWGSYL--NEVIRAYNNALYTAAVRST

>NP\_004095.4\_fatty\_acid\_synthase\_\_Homo\_sapiens\_

EVVIAGMSGKLPES-ENLQEFWDLNIGGVDM---VTDDRRWKAAGLYGLPRRSGKLIK-----  
DLSRFDASFFGVHPKQAHTMDPQLRLLLEVTYEAIVD---GGIN---PDSLRTGTHGTGVWVGVSGSET-----SEALS--DPETLVGYSMVGCQ-R--  
AMMANRISFFDFKGPSIALDTACSSSLMALQNA YQAIHSGECPAAIVGGINLLKPNTSVQ--FLRL-----GML-SPDGTCRSDFS---G-NGYCRSEG-  
VAVLLTK--KSLARR----VYATILNAGTNTDGFKEQG---VTFPSGDIQEQLIRSLYQSAG---VA-PES---FEYIEAHGTGTVGDPQELNGITR-AL---  
CATRQPELLIGSVKSNMGHSEPASGLAALAKVLLSLEHGLWAPNLHFN-SP-NPEIP-ALLDGRQLVVDQPLPVR-----  
GGNVGINSFSGFGGSNVHILRPNTQPAPHATLPRLLRASGRTPAVQKLEEQLRHS-QD---LAFVSMNLNDIAAVPA

>NP\_032014.3\_fatty\_acid\_synthase\_\_Mus\_musculus\_

EVVIAGMSGKLPES-ENLQEFWANLIGGVDM---VTDDRRWKAAGLYGLPKRS-GKLIK-----  
DLSKFDASFFGVHPKQAHTMDPQLRLLLEVTYEAIVD---GGIN---PDSLRTGTHGTGVWVGVSGSEA-----SEALS--DPETLVGYSMVGCQ-R--  
AMMANRISFFDFKGPSIALDTACSSSLMALQNA YQAIHSGECPAAIVGGINLLKPNTSVQ--FMKL-----GML-SPDGTCSRSDFS---G-NGYCRSEA-  
VAVLLTK--KSLARR----VYATILNAGTNTDGSKEQG---VTFPSGEVQEQLICSLYQPPAG--LA-PES---LEYIEAHGTGTVGDPQELNGITR-SL---  
CAFRQAPLLIGSVKSNMGHSEPASGLAALTKVLLSLEHGLWAPNLHFN-SP-NPEIP-ALLDGRQLVVDRLPVR-----  
GGNVGINSFSGFGGSNVHILRPNTQRPTAHAALPHLLHAGSRTLEAVQDLLEQGRQHS-QD---LAFVSMNLNDIAATPT

>NP\_059028.1\_fatty\_acid\_synthase\_\_Rattus\_norvegicus\_

EVVIAGMSGKLPES-ENLQEFWANLIGGVDM---VTDDRRWKAAGLYGLPK--RSGKLIK-----  
DLSKFDASFFGVHPKQAHTMDPQLRLLLEVTYEAIVD---GGIN---PDSLRTGTHGTGVWVGVSGSEA-----SEALS--DPETLVGYSMVGCQ-R--  
AMMANRISYTFDQGPSFSDTACSSSLALQNA YQAIHSGECPAAIVGGINLLKPNTSVQ--FMKL-----GML-SPDGTCSRSDFS---G-NGYCRSEA-  
VAVLLTK--KSLARR----VYATILNAGTNTDGSKEQG---VTFPSGAEQEQILIRSLYQPPG--VA-PES---LEYIEAHGTGTVGDPQELNGITR-SL---  
CAFRQSPLLIGSVKSNMGHSEPASGLAALTKVLLSLEHGLWAPNLHFN-SP-NPEIP-ALLDGRQLVVDRLPVR-----  
GGVIGINSFSGFGGANVHILRPNTQAPHAALPHLLHAGSRTLEAVQDLLEQGRQHS-QD---LAFVSMNLNDIAATPT

>NP\_492417.2\_Fatty\_Acid\_Synthase\_\_Caenorhabditis\_elegans\_

DIVISGVSGRFRPC-DNVKMFQMDLLAGEDL---VTEDSLRWTPGFCDLPKRH-GKLIK-----  
VLNKFDAGFFQVTPKQANFMDPQVRLLEASWEAMVD---AGIN---PTDLRGSKTVGVFVGSASET-----SGMLTQ--DPDVTGYTLTGCV-R--  
SMFSNRISYTFDQGPSFSDTACSSSLALQNA YQAIHSGECPAAIVGGINLLKPNTSVQ--FMKL-----GML-SPDGTCSRSDFS---G-DGYCRTEG-  
VA AIFQR--KKKQR---LYATVVHAKSNTDGHKEHG---ITFPSGERQAQLLEQVYSEAG---ID-PNS---VYVVEAHGTGTVGDPQEANAICE-VF---  
CSKRTDILLIGSVKSNMGHSEPASGVCSLTKILLSIERQLIPNHLHYN-TP-NQYIP-GLTDRGLKVVPTEPALP-----  
GGLIGINSFSGFGGSNVHILKAADHPITPHPFTKLVTYCGRTEAVEIFTEIESNKDD---LYLQALLANQANMPA

>NP\_608748.1\_fatty\_acid\_synthase\_1\_\_isoform\_A\_\_Drosophila\_melanogaster\_

EIAITGFSGRLPES-STIEEFKQNLFDGVDM---VNDDPRRWERGLYGLPD---RIGKPKDS-----DLENFDQQFFGVHQQKAECDMDPLLRMLLELTHEAIID---  
AGLN---PSDLRGSRTGVYIGVSNSET----EQHWCS--DADRNVNGYGLTGCA-R--  
AMFANRISFTFDFKGPSYSDTACSSSLYALEQAFSDMREGKVDNALVAGAGLILKPTMSLQ--FKRL----NML-SPDGSKAFDES---G-NGYVRS-DG-  
CVVLLQR--TSAARR----VYASILNVRTNTDGFKEQG---ITYPIGMQNRILIRETYEEIG---LN-PAD---VYVVEAHGTGTVGDPQEVSNTD-FF---  
CKDRTPPLIGSVKSNMGHSEPASGVCSVAKILIAMEEGVIPGNLHYN-KP-NPDLV-GLVDGRLKVVDRLNPWN-----  
GGIIGLSNFGFGGANAHVILKSNPKLTPKDGALKVVLASGRTEFAVEQLLESASTNA-DDDEYQLINEIHSKAIPNH

>NP\_990486.2\_fatty\_acid\_synthase\_\_Gallus\_gallus\_

DVVIAGIAGKLPES-ENLQEFWENLLNGVDM---VTEDRRWKPQGIYGLPKRN-GKLIK-----DIKFDASFFGVHPKQAHTMDPQLRLLLEVSYEAILD--  
-GGIN--PTALRGTDTGVWVVGASGSEA-----AEALSQ--DPELLGYSMTGCC-R--  
AMLANRISYTFDFRGPSTVDTACSSSLMALENA YKAIHSGECPAAIVGGINLLKPNTSVQ--FMKL-----GML-SPDGACKAFDVS---G-NGYCRSEA-  
VVVLLTK--KSMKR----VYATIVNAGSNTDGFKEQG---VTFPSGEMQQQVLGSLYREG--IK-PGD---VEYVEAHGTGTVGDPQEVNIGVN-VF---  
CQCEREPLLIGSVKSNMGHSEPASGLAALAKVILLSLEHGLWAPNLHFN-DP-NPDIP-ALHDGSLKVCKPTPVK-----  
GGLVINSFSGFGGSNAHVILRPNKQPETCNLPRVLCGRTEQAVEILIEESRKHGGC---SPFLSLLSDISAVPV

>pdb|3HHD|D\_Chain\_D\_\_Fatty\_acid\_synthase

EVVIAGMSGKLPES-ENLQEFWDLNIGGVDM---VTDDRRWKAAGLYGLPR--RSGKLIK-----  
DLSRFDASFFGVHPKQAHTMDPQLRLLLEVTYEAIVD---GGIN---PDSLRTGTHGTGVWVGVSGSET-----SEALS--DPETLVGYSMVGCQ-R--  
AMMANRISFFDFRGPSTVDTACSSSLMALQNA YQAIHSGECPAAIVGGINLLKPNTSVQ--FLRL-----GML-SPEGTCKAFDVS---G-NGYCRSEG-  
VAVLLTK--KSLARR----VYATILNAGTNTDGFKEQG---VTFPSGDIQEQLIRSLYQSAG---VA-PES---FEYIEAHGTGTVGDPQELNGITR-AL---  
CATRQPELLIGSVKSNMGHSEPASGLAALAKVLLSLEHGLWAPNLHFN-SP-NPEIP-ALLDGRQLVVDQPLPVR-----  
GGNVGINSFSGFGGSNVHILRPNTQPAPHATLPRLLRASGRTPAVQKLEEQLRHS-QD---LAFVSMNLNDIAAVPA

>pdb|5BP1|A\_Chain\_A\_\_Mycoserocic\_Acid\_Synthase

PVAIIGMACRLPGAINSPQQLWEALLRGDDF-VTEIPTGR-WDAEEYYDPEPG-VPGR-SVSKWGAFLD----  
DPAAFDPEFFGITEREAAAIDPQHRLLETAWEAVEH---SGLN---PAGLAGSATGVFMGLTHNDY----AHLAAD--AKALEGPYGFTGTS-F--  
SLASGRVAYALGVHGPVITVDTACSSSLSAIHMACRSLHDGESDVALAGGVSVLLEPRKAAG--GSAA-----GML-SPTGRCHAFDTA---A-DGFVSAEG-  
CVVLTLLKR--LDDAVADGDR-ILAVIRGTATNQDGRTV-----NIATPSADAQAKVYRMALKAAG---VE-PGT---VGLVEAHGTGTPVGDPLEFSSLAE-VY-----  
GTDGPCALGSIKTNFGHTQSAAGALGVMKAVALAQHNVPQNLHFT----RLPDQMAEIETGLFVPEITPWPVREGQ-----  
PRRAAVSAYGLSGTNVHAILEQAPEISPKAGNALVFPVSASSADALRSTAQHLADWLLRSGLD-----

>sp|A0A089QRB9.2|MSL3\_MYCTU\_\_Mycocerosic\_acid\_synthase-like\_polyketide\_synthase\_

SVAVIGMACRLPGGIDSPQRLWEALLRGDDL-VGEIPADR-WDANVYDPEPG-VPGR-SVSRWGAFLD----  
DVGGFDCDFGLTEREATAIDPQHRLLEVSWEAIEH---AGVD---PATLAESQTGVFVGLTHGDY----ELLSAD--CGAAEGPYGFTGTS-N--  
SFASGRVAYTLGLHGPAITVDTACSSSLTAIHMACRSLHDGESDVALAGGVSVLLEPRKASV--GSLQ-----GML-SPTGRCHAFDTA---A-DGFVSAEG-  
CVVLTLLKR--LPDAVRDGDGR-VLAVIRGTAAANQDGRTV-----NIAAPSAQAQIAVYQQALAAAG---VE-AST---VGMVEAHGTGTPVGDPEYASLAA-VY-----  
-GTEGPCALTSVKTNFGHLQASAGPLGLMKTILALRHGVVPPQNLHFC----RLPDQLAEIDTELFVPEITPWPVREGQ-----  
PRRAAVSAYGLSGTNVHAILEQAPEISPKAGNALVFPVSASSADALRSTAQHLADWVVDQNGNAVSMRDLGYTLSCRRRA

>sp|A0R1E8.1|PKS5\_MYCS2\_RecName\_\_Full\_Mycocerosic\_acid\_synthase-like\_polyketide\_synthase

PVAIIGMACRLPGAINSPQQLWEALLRGDDF-VTEIPTGR-WDAEEYYDPEPG-VPGR-SVSKWGAFLD----  
DPAAFDPEFFGITEREAAAIDPQHRLLETAWEAVEH---SGLN---PAGLAGSATGVFMGLTHNDY----AHLAAD--AKALEGPYGFTGTS-F--  
SLASGRVAYALGVHGPVITVDTACSSSLSAIHMACRSLHDGESDVALAGGVSVLLEPRKASV--GSLQ-----GML-SPTGRCHAFDTA---A-DGFVSAEG-  
CVVLTLLKR--LDDAVADGDR-ILAVIRGTATNQDGRTV-----NIATPSADAQAKVYRMALKAAG---VE-PGT---VGLVEAHGTGTPVGDPLEFSSLAE-VY-----  
GTDGPCALGSIKTNFGHTQSAAGALGVMKAVALAQHNVPQNLHFT----RLPDQMAEIETGLFVPEITPWPVREGQ-----  
PRRAAVSAYGLSGTNVHAILEQAPEISPKAGNALVFPVSASSADALRSTAQHLADWLLRSGLD-----

>sp|B2HIL7.1|MSL7\_MYCMM\_RecName\_\_Full\_Phenolphthiocerol\_synthase\_polyketide\_synthase\_type\_I\_

PVAVVIGICRFPFGADGPEGLWDLVSQGRDA-VTEFPNDRGWDTGLFDPDPD-AEGKTYTR-WGAFVE----  
NATNFDAGFFGIPPSEVLAMDPQQRLLMLEVSWEALEH---AGID---PMSLRGSSSTGVFTGIFAPSY-----GGK--DVGALQGYGLTGSP-V--  
SVASGRVAYVYVLEGLGPAITVDTACSSSLVAIHMAASLRSGECMDALAGGVTVMLGPSIFV--FSRQ-----RGL-AADGRCKAFDFAA---A-DGTGWGEG-  
AGVVLVLER--LSDAQRNGHN-VLAVVRGSAINQDGNASN-----GLTAPNGLAQQRVIAAALANCG--LT-SAD---VDVVEAHGTATTLGDPPIEAELLA-TY-----  
GQPTDQPLWVGSIKSNMGTQAAAGVAGVIKVMQAMRHGLMPASLHVD-EP-SKRVD--WESGAVSVLAEARDWP--DA---GR-----  
PRRAGVSSFGISGTNAHVILEEAPAKGEPSPVVPVVISARSAEALTAQAGRLLAHV-QADPQSNPVDIGFSLAGRSA

>sp|O31782.3|PKSN\_BACSU\_RecName\_\_Full\_Polyketide\_synthase\_PksN

PIAVIGISGIFPMA-KDVEAYWNILKEGKDC-MTEIPKDR-WDWREYEGDPAK-EVNKTNV-K-WGGFID----  
GIADFDFPFPGIPSPREAEQMEPQQRLLTYAWKAIED---AGYS---AKRSLGKTGVFIGTGNTGY-----SLLSK--ANSAIEGSAANTS-P--  
SVGPNRVSYFLNLHGPEPVDVDTACSSSLVAIHMAISIEEGTCMDALAGGVNTLILPEVYIS--FDKA-----GAL-SKEGKCKTFSNQ---A-DGFAHGE-  
AGILFLK--LKAEEAGDH-IYGVIKGSAINHGGRAS-----LTPNPKAQADVIQSAAYQKAG--ID-PKT---VTYIEAHGTGTELDGPVEINGLKS-  
AFKALGVNSANPYCGLGSVKTNIGHLSLAAAGAVIKILLQLKHKHTLVKSLHCE-----

>sp|O31784.2|PKSR\_BACSU\_RecName\_\_Full\_Polyketide\_synthase\_PksR

GIAIIGMSGQFPA-KNSVTEFWDNLVQGNK-VSEVPER-WDWRKY--AAAD-KEGQSSLQ-WGGFIE----  
GIGFDPLFFGIPSPKEAANMDPQEFLLLIHAWKAMED---AGLT---GQVLSRPTGVFVAAGNTDT-----AVV-P--  
SLIPNRISYALDVKGPSEYEAACSSALVALHRAIQSIRNGECEQAIVAVNLLSPPKGFIG--FDSM-----GYL-SEKQAKSFQAD---A-NGFVRSEG-  
AGVLIIP--LQKAIEDSDH-IYSVIKGSVSHGGRGMS-----LHAPNPAKMDAMLKAYQGAQ--ID-PKT---VTYIEAHGASPLADAIEIEALKS-GC----SQ-  
EEAPCYSSLPKPSIGHGELVSGMAALMKVSMAMKHQITPISGIFS-SL-NDQVS--LKGTRFRVTAENQQR--DL---  
SDDAGKIPRRASINSYFSGGVNAHVILEEYIPVSMSENGAHIVVLSAKNQDRKAIQAQQQLDYV--NKQQLSLQDYAYTLQTGRE

>sp|O53901.2|PKS5\_MYCTU\_RecName\_\_Full\_Mycocerosic\_acid\_synthase-like\_polyketide\_synthase

PVAVIGMGCRPLPGGIDSPDRLWEALLRGDDL-VTEIPADR-WDIDEYYDPEPG-VPGRTDCK-WGAYLD----  
NVGDFDPEFFGIGKEAIAIDPQHRLLETSWEAMEH---GGLT---PNQMAS-RTGVFVGLVHTDY----ILVHAD--NQTFEGPYGNTGTN-A--  
CFASGRVAYAMGLQGPVITVDTACSSSLTAIHMACRSLHDGESDVALAGGVSVLLEPRRFAS--GSAL-----GML-SATGRCHAFDVS---A-DGFVSAEG-  
CVMLALKR--LPDALADGDR-ILAVIRGTAAANQDGHV-----NIATPSRSQAQVAAVREALDVAG---VD-PAT---VGMVEAHGTPVGDPEYASLAE-VY-----  
GNDGPCALASVKTNFGHTQSAAGALGLMKAVALAQHNVPQNLHFT----ALPDKLAAIETNLFVPEITPWPVREGQ-----  
ETPRRAAVSAYGMTGTNVHAIVEQAPVATPGIDGALLFALSASSQDALRQTAARLADWVDAQGPELAPADLAYTLARRRG

>sp|P16540.1|KAS1\_STRVN\_RecName\_\_Full\_Granaticin\_polyketide\_putative\_beta-ketoacyl\_synthase\_1\_AltName\_\_Full\_ORF1

RVVITGVGVRAPGG-SGTFEFDWLLTAGRTA-----TRPISFFDASPFRRSIA-----GEIDFDAVAEGFSPREVRMRDRATQFAVACTRDALAD---  
SGLD---TGALDPSRIGVALGSAVAYLVMSDSGREWL--DPAHLSMMFDYLS-P--  
GVMPEAVAWAAGAEGPVTMVSVDGCTSGLDVGYAVQGTREGSADVAVAGADTPVSPVIVAC--FDAI-KATTPRNDPAHASRPFDDGT--R-NGFVLAEG-  
AAMFVLEE--YEAQRRAH-IYAEVGGYATRQAYHMTG---LKKDGREMAESIRALDEAR--LD-RTA---VDYVNAHSGTGKQNDRHETAFAKRSGLG--  
---EHAYAVPVSSIKSMGGHSLGAGSIEIASVLAIEHNVPPATANLH-----

>sp|P16541.2|KAS2\_STRVN\_RecName\_\_Full\_Granaticin\_polyketide\_putative\_beta-ketoacyl\_synthase\_2\_AltName\_\_Full\_ORF2

RAVVVTGLSVAAPGG-LGTERYWKSLTGTENG---IAELSRFDASRYPRLAG-----QIDDFEAS-EHLPSRLLPQTDVSTRYALAAADWALAD---  
AGV--PESGLDDDLGVVSTAQGDFTHREFHKLWSQ--GPAVYVSYESFAWF-Y--  
AVNTGQISIRNTMRGPSAALVGEQAGGLDAIGHARRTVRRGPGWCSAVASTRSTRGASSSQ--LSGG--LVSTVADPERAYLPFDVD--A-SGYVPGEG-  
GAVLIVED--ADSARARGAERIV--RSPLRRDPAPGSG-----RPPALGRAEALALAEAG--LT-PAD---ISVVFADGAGVPELDRAEADTLAR-LF---GP--  
RGVPVTAPKALTGRLCAGGGPADLAAALLALRDQVIPATGRH-----

>sp|P40806.3|PKSJ\_BACSU\_RecName\_\_Full\_Polyketide\_synthase\_PksJ\_Short\_PKS



PVAIVGISGRFPGA-MDIDEFWKNLEEGKDS-ITEVPKDR-WDWREHYGNPDT-DVNKTDIK-WGGFID---  
GVAEFDPLFFGISPREADYVDPQRLMLTYVWKALED---AGCS---PQSLSGTGTGIFGTGNTGY----KDLFHR--ANLPIEGHAATGHMIP--  
SVGPNRMSYFLNIHGSPSEPVETACSSSLVAIHRAVTA MQNGDCEMAIAAGVNTILTEEAHIS--YSKA----GML-STDGRCKTFSAD---A-NGYVRGEG-  
VGMVMLKK--LEDAERDGNH-IYGVIRGTAENHGGGRANT-----LTSPNPKAQADLLVRA YRQAD---ID-PST---VTYIEAHGTGTSLGDPPIEINGLKA-  
AFKELSNMVPDHRGIGSVKSNIGHLELAAGISGLIKVLLQMKHKTLVKS LHCE-TL-NPYLQ--LTDSPFYIVQEKQEWK--SV---  
TDRDGNLPRRAGISFSGVGNNAHVIEEYMPHEATEQP NVIVLSAKNRSRLDRASQLLEVI-RNKKYQDLHRIAYTLQVGRE

>sp|P40872.4|PKSM\_BACSU\_RecName\_\_Full\_Polyketide\_synthase\_PksM

DIAIIGMAGRYPKA-KNIQEFWEQLKAGTDC-ITEIPNSR-WEWKESDGLDSP--AGKPLSK-WGGFIE---  
EADCFDPQFFRISPREAEMMDPQERLFLETCEWAEIED---AGYT---PETIASPHVGVFAGVMHKDY----SLIGAE--ALSEHNPFPLSLNYAQ---  
IANRVSYYCNFHGSPMAVDTVCSSSLTAVHLAIESIRNGECEAALAGVNL SLHPAKYIS--YGSV----GMH-SSDGYCHTFGKG--G-DGYVSGEG-  
VGTVLLKP--LRKAEQDGR-IYAVIKGSAINHVGVKVS----GITVPSVAQADVIEACLEKGTG---ID-PRT---ISYVEAHGTGTSLGDPPIEVQGLVK-AFSRNTQD--  
KQFCSIGSVKSNIGHAEAAAAGISGLTKTVLQLHHKTLVPSLHSE-EL-NPYLK--LDQTPFFVQHETKEWE--  
QPSFTENGVDVYPRRAGLSFSGAGSNAHLILEEYIPQTPKDHPPALIVLSAKNMERLQEKAEQLLTAI-KQKRYTDLIRIAYTLQGTRE

>sp|P41175.1|KAS1\_STRCM\_RecName\_\_Full\_Putative\_polyketide\_beta-ketoacyl\_synthase\_1\_AltName\_\_Full\_ORF1

RVAITGIEVLAPGG-LGRKEFWQLLSEGRTA-----TRGITFFDPAPFRSKVA-----AEADFCGLENGLSPEVRRMDRAAQFAVVTA-RAVED---  
SGAE---LAHPPHRIGVVVGS AVGYR VVSDGGRLDLV--DHRYAVPHLYNYLV-P--  
SSFAAEVAVAVGAEGPSTVVSTGCTSGIDAVGLAELVREGSVDVMVAGAVDAPISIPCVL-DAIKA---TTPRHADAPATASRPFDST---R-NGFVLGEG-  
AAFFVLEE--LHSARRRGAH-IYAEIAGYATRSNAYHMTG-----LRDGAEMAEAIRLALDEAR---LN-PEQ---VDYINAHGSGTKQNDRHETA AFKALG-----  
EHAYRTPVSSIKSMVGHSLGAIGSIEIAASALAMEYDVVPPTANLH-----  
-----

>sp|P41176.1|KAS2\_STRCM\_RecName\_\_Full\_Putative\_polyketide\_beta-ketoacyl\_synthase\_2\_AltName\_\_Full\_ORF2

PVAVTGMGIAAPNGLGRPTTGRPPWAPRAAS-----AASRFDPSPGYAQLAG-----EIPGFRAA-EHLPGRLLVPQTDVTRLSLAAADWALAD---  
AGVE---VAADFPLDMGVVTA SHAGEFGQDELQKLLGQ--GQPVLSAYQSAFW-Y--AVNSGQISIRHGMKGPSPGVVSDQAGGLDALAQARRLVRKG-  
TPLIVCGAVEPRSPAGAGSP--SSPA--GGMSDSDEPNRAYLPFDRD---G-RGYVPGGGRGVVPPLER--AEAAPARGAE-VYGEAGPLARLPAPHSGRG-----  
STRAHAIRALDDAG---TA-PGD---IRR VFADGGGRYPNDRAEAEASE-VF-----GPRGPVPTCPRTMTGRLHSGAAPLDVACALLAMRAGVIPPTVHID-----  
-----

>sp|P43678.2|KAS1\_STRRM\_RecName\_\_Full\_Oxytetracycline\_polyketide\_putative\_beta-ketoacyl\_synthase\_1

RVVITGIGVAPGD-VGTPKPFWEMLTAGRTA---TRPISSFDASPFRSQVA-----AECDPFAAEGLSQRQVRAWDRTMQFAYVAAREALAD---  
SGVT---GEADPRTGVMAGTACGYA VVSDEGRLWQV--DDAHGV PPLYDYFP-P--  
SSMAAEIWLAEAEAGPAGVVSAGCTSGIDVLTHAADLVRDGAEMVAVAGASDAISIPITVAC--FDAI-KATTPRNDEPETASRPFDRT---R-NGFVLGEG-  
AAFFVLEE--YAHARRR GAR-AYAEIAGYAGRCNAYSMTG-----LRSDGRELAEAVSRALDIAR---VD-PSE---VDYVNAHGSATKQNDLHETA AFKRSLG-----  
-PHAYSVPISIKSMIGHSLGAICALEVAASALRIEHGVIPTANLR-----  
-----

>sp|P96202.2|PPSC\_MYCTU\_RecName\_\_Full\_Phthiocerol\_synthase\_polyketide\_synthase\_type\_1

PIAVIGMGRFPGVGNNEQFWDLLCAGRSG-IVRVPAR-WDADAYYCDHT-VPGTICST-EGGFLTSW--  
QPDEFDAEFFSISPREAAAMPQORLLIEVAWEALED---AGVP---QHTIRGTQTSVFGVTA YDYMLTLA GRLR----PVDLDA YIPTGNS-A--  
NFAAGRLAYILGARGPAVVIDTACSSSLVA VHLACQSLRGRESMALVGGTNLLSPGPSIA--CSRW-----GML-SPEGRCKTFDAS---A-DGYVVRGEG-  
AAVVVLKR--LDDAVRDGDR-ILAVIRGSAVNDGASS---GVTVPNGPAQALLAKALTSK---LT-AAD---IDYVEAHGTGTPLGDPPIEQLSLSK-  
VFSRDRAGS---DQLVIGSVKTNLGHLEAAAGVAGLMAKVALAVHNGYIPRHLNFH-QL-TPHAS--EAASRLRIAADGIDWP--TT---GR-----  
PRRAGVSSFGVSGTNAHVIEQAPDQRGPVAVSTLVVFGKTA PRVAATASVLADWL--DGPVPLADVAHTLNHRA

>sp|P9WQE0.1|PPSE\_MYCTO\_RecName\_\_Full\_Phthiocerol\_synthase\_polyketide\_synthase\_type\_1

AIAVVGMAGRFPGA-KDVSAFWSNLRRGKES-IVTLSEQE-LRDAGVSDKTLA-DP--AYVR-RAPLLD---  
GIDEFDAGFFGFPPLAAQVLDPOHRLFLQCAWHALED---AGAD---PARFDGS-IGVYGTSSPSGYLLHNLSHR----DPNAVLAEGLNFDQ-F--  
SLLATRISHAFNLRGPIAVQVACSSSLVA VHLACL SLLSGECMALAGGSSLCIPHRVGYF--TSPG-----SMV-SAVGHCRPFVDV---A-DGTVFGSG-  
VGLVVLKR--LAAAIDAADR-IHAVIRGSAINNDGSAKMG---YAAPNPAQAQDVIAEHAH VSG--ID-SST---VSYVECHGTGTPLGDPPIEQLLRA-AF---  
EVSRSAPCVLGSVKSNIHLEVAAGIAGLIKTLCLKNKALPATLHYT-SP-NPELR--LDQSPFVQSKYGPWE--CD---G-----  
VRRAGVSSFGVGGTNAHVVEEAPAAHAEPAGPVILLSAQTAAALGESRTALAAAL--ETQDPRLSDVAYTLARRRK

>sp|P9WQE1.1|PPSE\_MYCTO\_RecName\_\_Full\_Phthiocerol\_synthase\_polyketide\_synthase\_type\_1

AIAVVGMAGRFPGA-KDVSAFWSNLRRGKES-IVTLSEQE-LRDAGVSDKTLA-DP--AYVR-RAPLLD---  
GIDEFDAGFFGFPPLAAQVLDPOHRLFLQCAWHALED---AGAD---PARFDGS-IGVYGTSSPSGYLLHNLSHR----DPNAVLAEGLNFDQ-F--  
SLLATRISHAFNLRGPIAVQVACSSSLVA VHLACL SLLSGECMALAGGSSLCIPHRVGYF--TSPG-----SMV-SAVGHCRPFVDV---A-DGTVFGSG-  
VGLVVLKR--LAAAIDAADR-IHAVIRGSAINNDGSAKMG---YAAPNPAQAQDVIAEHAH VSG--ID-SST---VSYVECHGTGTPLGDPPIEQLLRA-AF---  
EVSRSAPCVLGSVKSNIHLEVAAGIAGLIKTLCLKNKALPATLHYT-SP-NPELR--LDQSPFVQSKYGPWE--CD---G-----  
VRRAGVSSFGVGGTNAHVVEEAPAAHAEPAGPVILLSAQTAAALGESRTALAAAL--ETQDPRLSDVAYTLARRRK

>sp|P9WQE2.1|PPSD\_MYCTO\_RecName\_\_Full\_Phthiocerol\_synthase\_polyketide\_synthase\_type\_1

PVAVVIGCRFPGNVTGPESFWQLLADGVDT-IEQVPPDR-WDADAFYDPDPS-ASGRMTTK-WGGFVS---  
DVDAFDADFFGITPREAVAMPDQHRMLLEVAVEALEH---AGIP---PDSLSGTRTGVMMLGSSWDY----TIVNIE--RRADIDAYLSTGTP-H--  
CAAVGRIAYLLGLRGPVAVDTACSSSLVAIHLACQSLRLRETDVALAGGVQLTSPFTAIA--LSKW-----SAL-SPTGRCNSFDAN---A-DGFVRGEG-  
CGVVIYLR--LADA VRDQDR-VLAVVRGSA TNDSGRSN---GMTAPNALAQORDVITSALKLAD---VT-PDS---VNYVETHGTGTPLGDPPIEFESLAA-  
TYGLGKQG-GESPCALGSVKTNIHLEAAAGVAGFIKVALAVQRGHIPRNLFHT-RW-NPAID--ASATRLFVPTESAPWPAAG-----  
PRRAAVSSFGVSGTNAHVVEEAPDAAGMPVYSALNVSGKTAARVASAAAVLADWMSGPGAAAPLADVAHTLNHRA

>sp|P9WQE3.1|PPSD\_MYCTO\_RecName\_\_Full\_Phthiocerol\_synthase\_polyketide\_synthase\_type\_1

PVAVVIGICRFPNGVTGPESFWQLLADGVDT-IEQVPPDR-WDADAFYDPDPS-ASGRMTTK-WGGFVS----  
DVDAFDADFFGITPREAVAMDQPHRMLEVAWEALEH---AGIP---PDSLSTRTGVMGLSSWDY----TIVNIE--RRADIDAYLSTGTP-H--  
CAAVGRIAYLLGLRGPVAVDTACSSSLVAIHLACQSLRLRETDLALAGGVQLTSPPTAIA--LSKW-----SAL-SPTGRCSNFDAN---A-DGFVRGEG-  
CGVVVLKR--LADAVRDQDR-VLAVVRGSAVNDGGRSN----GMTAPNALAQORDVITSALKLAD---VT-PDS---VNYVETHGTGTVLGDPIEFESLAA-  
TYGLGKGQ-GESPCALGSKVKTNIGHLEAAAGVAGFIKAVLAVQRGHIPRNHFT-RW-NPAID--ASATRLFVPTESAPWPAAG-----  
PRRAAVSSFLGSGTNAHVVEQAPDAAGMPYVSALNVSGKTAARVASAAAVLADWMSGPGAAAPLADVAHTLNRHRA

>sp|P9WQE4.1|PPSB\_MYCTO\_RecName\_\_Full\_Phthiocerol\_synthesis\_polyketide\_synthase\_type\_I

PVAVVIGICRFPDGDVDPESFWDFLVAGRNA-ISTVPADR-WDAEAFYHPDPL-TPGRMTTK-WGGFVP---  
DVAGFDAEFFGITPREAAAMDPQQRMLLEVAWEALEH---AGIP---PDSLGGTRTAVMMGVYFNEY----QSMMLAA--SPQNVDAVSGTGNA-H--  
SITVGRISYLLGLRGPVAVDTACSSSLVAIHLACQSLRLRETDLALAGGVQITLSPETQIA--ISAW----GLL-SPQGRCAAFDAA---A-DGFVRGEG-  
AGVVVLKR--LTDVAVRDGDQ-VLAVVRGSAVNDGGRSN----GVTAPNTAAQCDVIADALRSGD---VA-PDS---VNYVEAHGTGTVLGDPIEFALAA-TY---  
GH-GGDACALGAVKTNIGHLEAAAGIAGFIKATLAVQRATIPPNLHFS-QW-NPAID--AASTRFFVPTQNSPWPTAEG-----  
PRRAAVSSFLGSGTNAHVVEIQEGEGEDTGVSTLVVTGKTAQRMAATAQVLADWMEGPGAEVAVADVAHTVNHHR

>sp|P9WQE5.1|PPSB\_MYCTU\_RecName\_\_Full\_Phthiocerol\_synthesis\_polyketide\_synthase\_type\_I

PVAVVIGICRFPDGDVDPESFWDFLVAGRNA-ISTVPADR-WDAEAFYHPDPL-TPGRMTTK-WGGFVP---  
DVAGFDAEFFGITPREAAAMDPQQRMLLEVAWEALEH---AGIP---PDSLGGTRTAVMMGVYFNEY----QSMMLAA--SPQNVDAVSGTGNA-H--  
SITVGRISYLLGLRGPVAVDTACSSSLVAIHLACQSLRLRETDLALAGGVQITLSPETQIA--ISAW----GLL-SPQGRCAAFDAA---A-DGFVRGEG-  
AGVVVLKR--LTDVAVRDGDQ-VLAVVRGSAVNDGGRSN----GVTAPNTAAQCDVIADALRSGD---VA-PDS---VNYVEAHGTGTVLGDPIEFALAA-TY---  
GH-GGDACALGAVKTNIGHLEAAAGIAGFIKATLAVQRATIPPNLHFS-QW-NPAID--AASTRFFVPTQNSPWPTAEG-----  
PRRAAVSSFLGSGTNAHVVEIQEGEGEDTGVSTLVVTGKTAQRMAATAQVLADWMEGPGAEVAVADVAHTVNHHR

>sp|P9WQE6.1|PPSA\_MYCTO\_RecName\_\_Full\_Phthiocerol\_synthesis\_polyketide\_synthase\_type\_I

PIAVVGMGCRFPFGISCEALWDFLCERRSS-ISQVPPQR-WQPFEGGPEVAALAR-TTR-WGSFLP---  
DIDAFDAEFFEISPSEADKMDPQQRLLLEVAWEALEH---AGIP---PGTLRRSATGVFAGACLSEY----GAMASA--DLSQVDGWSNSGGA-M--  
SIANRLSYFLDLRGPVAVDTACSSSLVAIHLACQSLRTQDCHLAIAAGVNLSSPAVFRG--FDQV----GAL-SPTGQCRAFDAT---A-DGFVRGEG-  
AGVVVLKR--LTDVAVRDGDQ-VLAVICGSAVNDGGRSN----GLMAPNPAQMAVLRRAAYTNAG---MQ-PSE---VDYVEAHGTGTLLGDPIEARALGT-VL---  
GRPESPLLIGSVKTNLGHTEAAAGIAGFIKTVLA VQHGIQIPPNQHFE-TA-NPHIP--FTDLRMKVVDQTTEWP--AT---GH-----  
PRRAGVSSFGGTTNAHVVEIQEGEGQGLSPA VSTLVVAGKTMQRVSATAGMLADWM-EGPGAVALADVAHTLNRHRS

>sp|P9WQE7.1|PPSA\_MYCTU\_RecName\_\_Full\_Phthiocerol\_synthesis\_polyketide\_synthase\_type\_I

PIAVVGMGCRFPFGISCEALWDFLCERRSS-ISQVPPQR-WQPFEGGPEVAALAR-TTR-WGSFLP---  
DIDAFDAEFFEISPSEADKMDPQQRLLLEVAWEALEH---AGIP---PGTLRRSATGVFAGACLSEY----GAMASA--DLSQVDGWSNSGGA-M--  
SIANRLSYFLDLRGPVAVDTACSSSLVAIHLACQSLRTQDCHLAIAAGVNLSSPAVFRG--FDQV----GAL-SPTGQCRAFDAT---A-DGFVRGEG-  
AGVVVLKR--LTDVAVRDGDQ-VLAVICGSAVNDGGRSN----GLMAPNPAQMAVLRRAAYTNAG---MQ-PSE---VDYVEAHGTGTLLGDPIEARALGT-VL---  
GRPESPLLIGSVKTNLGHTEAAAGIAGFIKTVLA VQHGIQIPPNQHFE-TA-NPHIP--FTDLRMKVVDQTTEWP--AT---GH-----  
PRRAGVSSFGGTTNAHVVEIQEGEGQGLSPA VSTLVVAGKTMQRVSATAGMLADWM-EGPGAVALADVAHTLNRHRS

>sp|Q02059.2|KASA\_STRCO\_RecName\_\_Full\_Actinorhodin\_polyketide\_putative\_beta-ketoacyl\_synthase\_1

RVVITGVGVRAPGG-NGTRQFWELTSGRTA-----TRRISFFDPSPYRSQVA-----AEADFDVPAEGFGPRELDRMDRASQFAVACAREAFAA--  
SGLD---PDTLDPARVGVSLGSAVAYLLSDDSGRDWEV--DAAWLSRHMFDYLV-P--  
SVMFAEVAWAVGAEQVPMVSTGCTSGLDVGNVRAIEGSAVDFMFAAGAADTPIVIVAC--FDAI-RATTARNDDPEHASRPFDDGT---R-DGFVLAEG-  
AAMFVLED--YDSALARGAR-IHAEISGYATRCNAYHMTG----LKADGREMAETIRVALDESR---TD-ATD---IDYINAHGSGTRQNDRHETAAVKRALG-----  
EHARRTPVSSIKSMVGHSLGAIGSLEIAACVLALEHGVVPTANLR-----  
-----

>sp|Q02062.1|KASB\_STRCO\_RecName\_\_Full\_Actinorhodin\_polyketide\_putative\_beta-ketoacyl\_synthase\_2

SVLITGVGVVAPNG-LGLAPYWSAVLDGRHG--LGPVTR-FDVSRYPATLAG-----QIDDFHAP-DHIPGRLLPQTDPSRRLALTAADWALQD--  
AKAD--PESLTDYDMGVVVTANACGDFTHREFRKLWSE--GPKSVSVYESFAWF-Y--AVNTGQISIRHGMRGPSALVAEQAGGLDALGHARRTIRRG-  
TPLVSSGGVDSALDPGWVS-QIASG---RISTATDPDRAYLPFDER--A-AGYVPEGEG-GAILVLED--SAAAEARGRHDAYGELAGCASTFDPAPGSG-----  
RPAGLERAIRLALNDAG---TG-PED---VDVVFADGAGVPELDAEAEARAIGR-VF-----  
GREGVPVTPKTTTGRLYSGGGPLDVVTALMSLREGVIAPTAGVT-----  
-----

>sp|Q02251.2|MCAS\_MYCBO\_RecName\_\_Full\_Mycocerosic\_acid\_synthase

PVAVIGMGCRLPGGINSKDLWESLLRGDDL-VTEIPPDR-WDADDYDPEPG-VPGR-SVSRWGGFLD---  
DVAGFDAEFFGISEREATSIDPQQRLLLETSWEAIEH---AGLD--PASLAGSSTAVFTGLTHEDY----LVLTIT--AGGLASPYVVTGLN-N--  
SVASGRIAHTLGLHGPAMTFDTACSSGLMAVHLACRSLHDGEADLALAGGCAVLEPHACVA--ASAQ----GML-SSTGRCHSFADAD---A-DGFVRSEG-  
CAMVLLKR--LPDALRDGNR-IFAVVRGTATNQDGRTE-----LTMPESDAQVAVYRAALAAAG---VQ-PET---GVVVEAHGTGTPIGDPIEYRSLAR-VY-----  
GAGTPCALGSAKSNMGHSTASAGTVGLIKAILSLRHGVVPLLHFN---RLPDELSDVETGLFVQAVTPWPNGND-----  
HTPKRVAVSSFGMSGTNVHAIVEEAPAPGDAEVPRLFMLSSTSSDALRQTARQLATWVEEHQDCVAASDLAYTLARGRA

>sp|Q03131.1|ERYA1\_SACER\_RecName\_\_Full\_6-deoxyerythronolide-B\_synthase

-----AVLRGTAVNSDGA--SN---GLSAPNGRAQVRVVIQQALESQ---LG-PAD---  
IDAVEAHGTGTGLDPIEARALFE-AY---GR--EQPLHLGSKVSNLGHQAAGVAGVIKMLAMRAGTLPRTLHAS-ER-SKEID--WSSGAILLDEPEPWP--  
A-----GAR---PRRAGVSSFGISGTNAHAIIEEAPQ-----VAPVWLSASSAEGLRAQAARLAAHL--REHP-DPRDIAYSLATGRA

>sp|Q03132.3|ERYA2\_SACER\_RecName\_\_Full\_6-deoxyerythronolide-B\_synthase

PIAIVGIGCRFPGGIGSPEQLWRVLAEGANL-TTGFPADRGWDIGRLYHPDPD-NPGTSYVD-KGGFLT---  
DAADFDPGFFGITPREALAMPDQQRLLMLETAWEAVER---AGID---PDALRGTDGTGVFVGMNGQSY-----MQLLAG--EAERVDGYQGLGNS-A--  
SVLSGRIA YTFGWEGPALTVDTACSSSLVGHILAMQALRRGECSLALAGGVTVMSPDYTFVD--FSTQ-----RGL-ASDGRCKAFSAR---A-DGFALSEG-  
VAALVLEP--LSRARANGHQ-VLAVLRGSAVNQDQASN-----GLAAPNGPSQERVIRQALAAAG---VP-AAD---VDVVEAHGTGTGLDPIEAGALIA-TY---  
GQDRDRPLRLGSKVKTNIHTQAAAGAAGVIVKVVLAAMRHGMPLRSLHAD-EL-SPHID--WESGAVEVLEEVVWPW--AG---ER-----  
PRRAGVSSFGVSGTNAHVIEEAPAAARTERGLPFVLSGRSEAVVAQAARALAEHL-RDTPLEGLTDAAWTLATGRA

>sp|Q03133.4|ERYA3\_SACER\_RecName\_\_Full\_6-deoxyerythronolide-B\_synthase

-----AVLAGSAVNQDGA--SN--GLTAPSGPAQQRVIRRALENAG---VR-AGD---  
VDVVEAHGTGTRLDPIEVHALLS-TY---GADPDDPLWIGSVKSNIGHTQAAAGVAGVMKAVLALRHGEMPRTLHFD-EP-SPQIE--  
WDLGAVSVVQARSWP--A-----GER---PRRAGVSSFGISGTNAHVIVIEEAP-----VPLVLSGRDEQAMRAQAGRLADHL--APEP-SLRDTGFTLATRAS

>sp|Q05470.3|PKSL\_BACSU\_RecName\_\_Full\_Polyketide\_synthase\_PksL\_Short\_PKS

EIAIIGISGRYPQA-DNIDELWEKLRDRGDC-ITEIPADR-WDHSLYYDEDKD-KPGKTYSK-WGGFMK---  
DVKDFDPOFFHISPREAKLMDPQERLFLQCVYETMED---AGYT---REHLGRKSVGVYVGVMYEEY-----QLYGAQ--EQVRGRSLALTGNPSS---  
IANRVSYFFDFHGPSIALDTCSSSLTAIHLACQSLQRGECEAAFGGVNVIHPNKYLM--LGQN----KFM-SSKGRCESFGQG--G-DGYVPGEG-  
VGA VLLKP--LSKAVEDGDH-IYGIKGTAINHGGKTN-----GYSVNPNAQADVIKKAFVEAK---VD-PRT---VSYIEAHGTGTSLDPIEITGLSK-VFTQETDD-  
KQFLAIGSAKSNIGHCESAAGVAVKLVLLQMKYRQLAPSLHSN-VL-NPNID--FLNSPFVKVQQUELEEWK--  
RPIISVNGKDIELPRIAGVSSFGAGGVNAHILIEEYAPRLTKQHRSAFLVLSAKKEKQLKAYAEAMKDFV-TSNEDIDLEDMA YTLQTGRE

>sp|Q07017.1|OL56\_STRAT\_RecName\_\_Full\_Oleandomycin\_polyketide\_synthase\_modules\_5\_and\_6

-----AVVRGSAVNQDGA--SN--GLTAPNGPSQQRVIRAALADAG---LA-PAD---  
VDVVEAHGTGTRLDPIEAQALLA-TY---GQAGGRPVLGWSVKSNIHTQAAAGVAGVMKMLVLRGGRVVPKTLHVD-EP-SPHVD--  
WSAGAVELLTEERPW---EP---EAER---LRRAGISAFVSGTNAHVIVIEEAP-AAGD--LVVPWVVSGRDARALRAQAARLAAHV--S---  
VSAVDVGSWSLVATRS

>AAR90242.1\_polyketide\_synthase\_\_Botrytis\_cinerea\_1

RVAIVDYQ-PITGHPLDKTQFVQTLQEGEDA-LREHSAAH-VNAEAFVVRTTQQ-KLSTYIHR-TMSFPAHSPSDVALKKP---  
MMPAKKQRLDVTQLYALNSCFERVAIIIASNLS---LSADRLQMRALWSGLPGSEG--AI-PLPELP--SINHWSWYGACGIG-----  
TAQLAQYFGISADCYAVEAACASSLAAVHDAVRALQAGRYDAVIVGGIETATLERDLV---LCSA-----QMM-LSVSRIRPFSQG---A-DGFTPGDG-  
GGFVMLTH-----HPVPR-AIATIEAISGSDSY-----SMTAPDPLGQALAIKKTLSLTA---ID-AQT---VQYLEAHGTGTGLDGRSEVMMLSKY-SY---  
HRDKHSPLYIGSAKYNFHCFAGAGALSCKVLSAFEHERIPPTVSE--L-NVDLP--LGDIPAEVPPQAIPWR--LS---EDG-----  
QRKAANAFGTGGINYL VIRQSS-----

>sp|Q7TXK8.1|MSL7\_MYCBO\_RecName\_\_Full\_Phenolphthiocerol\_synthase\_polyketide\_synthase\_type\_1

PVAVVGIGCRFPFGVDGPDGLWVVSAGRVD-VSEFPTDRGWDVEGLYDPDPD-AEGKTYTR-WGAFLD---  
DATGFDAGFFGIAPSEVLAMPDQQRLLMELVSWEALEH---AGID---PLSLRGSATGVYTGIFAASY-----GNR--DTGGLQGYGLTGTS-I--  
SVASGRVSYVLGLGPAVSVDTACSSSLVAIHWAMSSLRSGECDLALAGGVTVMGLPSIFVG--FSRQ-----RGL-AADGRCKAFAAA---A-DGTGWGEG-  
AGVVVLER--LDARRLGH-S-VLAVVRGSAVNQDQASN-----GLTAPNGLAQRVIAAALANAG---LS-AAD---VDVVEAHGTATTGLDPIEAQALLS-TY---  
GQPAPQLVWVGSIKSNMGTQAAAGVAGVIMVQAMRHGVMPATLHVD-EP-SPRVD--WTSGAVSVLTEAREWS--VD---GR-----  
PRRAVSSFGISGTNAHLILEEAPVTGGPRPSMVPVVISARSALTAQAQRLMAHV-QANPGLDPIVGC SLASRSV

>sp|Q7TXL6.1|PPSE\_MYCBO\_RecName\_\_Full\_Phthiocerol/phenolphthiocerol\_synthase\_polyketide\_synthase\_type\_1

AIAVVMAGRFPGA-KDVSAFWSNLRGKES-IVTLSEQE-LRDAGVSDKTLA-DP--AYVR-RAPLLD---  
GIDEFDAGFFGFPLAAQVLDPQHRLFLQCAWHALED---AGAD---PARFDGS-IGVYGTSSPSGYLLHNLSSH---DPNAVLAEGLNFDQ-F--  
SLLATRISHAFNLGRGPAVAVDTACSSSLVAIHLACQSLRLETDVLAGGVQLTSPFTAIA--LSKW-----SAL-SPTGRCNSFDAN---A-DGTVRGE-  
VGLVLLKP--LAA AIDAGR-IHAVIRGSAINNDGSAKMG---YAAPNPAQADVIAEAHAVSG--ID-SST---VSYVECHGTGTPLDPIEIQGLRA-AF---  
EVSRSAPCVLGSVKSNIHLEVAAGIAGLIKITLCLKNKALPATLHYT-SP-NPELR--LDQSPFVQSKYGPWE--CD---G-----  
VRRAGVSSFGVGGTNAHVVEEAPAAHAEPAGPVILLSAQTAALGESRTALAAAL--ETQDPRLSDVAYTLARRRK

>sp|Q7TXL7.1|PPSD\_MYCBO\_RecName\_\_Full\_Phthiocerol/phenolphthiocerol\_synthase\_polyketide\_synthase\_type\_1

PVAVVGIGCRFPFNGVTPESFVQLLADGVDI-IEQVPPDR-WDADAFYDPDPS-ASGRMTTK-WGGFVS---  
DVFADDFGFFGITPREAVAMPDQQRLLMELVSWEALEH---AGIP---PDSLGRTRTGVMMLGSSWDY-----TIVNIE--RRADIDAYLSTGTP-H--  
CAAVGRIAYLLGLRGPAVAVDTACSSSLVAIHLACQSLRLETDVLAGGVQLTSPFTAIA--LSKW-----SAL-SPTGRCNSFDAN---A-DGTVRGE-  
CGVVVLLK--LADAVRDQDR-VLAVVRGSAVNQDQASN-----GMTAPNALAQRDVITSALKLAD---VT-PDS---VNYVETHGTGTPLDPIEFESLAA-  
TYGLGKQG--GESPCALGSVKTNIHLEAAAGVAGFIKAVLAVQRGHIPRNLFH-RW-NPAID--ASATRLFVPTESAPWAAAAG-----  
PRRAVSSFGVSGTNAHVVEEAPDAAGGMPYVSALNVSGKTAARVASAAA VLADWMSGPAAAPLADVHTLNRHRA

>sp|Q7TXL8.1|PPSC\_MYCBO\_RecName\_\_Full\_Phthiocerol/phenolphthiocerol\_synthase\_polyketide\_synthase\_type\_1

PIAVIGMGRFPFGVNNPEQFWDLLCAGRSG-IVRVPAQR-WDADAYYCDHT-VPGTICST-EGGFLTSW--  
QPDEFDAEFFSISPREEAAMPDQQRLLMELVSWEALEH---AGVP---QHTIRGTQTSVFGVTA YDYMLTLAQRRL---PVDLDAYIPTGNS-A--  
NFAAGRIAYILGARGPAVAVDTACSSSLVAIHLACQSLRLETDVLAGGVQLTSPFTAIA--LSKW-----SAL-SPTGRCNSFDAN---A-DGTVRGE-  
AAVVVLLK--LDDAVRDGNR-ILAVVRGSAVNQDQASN-----GVTVPNGPAQALLAKALTSSK---LT-AAD---IDVVEAHGTGTPLDPIELDSLK-  
VFSRDRAGS---DQLVIGSVKTNLGHLEAAAGVAGLMAKAVLAVHNGYIPRHLNFH-QL-TPHAS--EAASRLRIAADGIDWP--TT---GR-----  
PRRAGVSSFGVSGTNAHVVEEAPDQGRPVAVSTLVVFGKTAAPRVAATASVLADWL--DGPVPLADVHTLNRHRA

>sp|Q7TXL9.1|PPSB\_MYCBO\_RecName\_\_Full\_Phthiocerol/phenolphthiocerol\_synthase\_polyketide\_synthase\_type\_1

PVAVVGIGCRFPDGDGPEFVDFVLAGRNA-ISTVPADR-WDAEFYHPDPL-TPGRMTTK-WGGFVP---  
DVAGFDAEFFGITPREAAAMPDQQRLLMELVSWEALEH---AGIP---PDSLGRTRTAVMMGVYFNEY-----QSMMLAA--SPQNVDAVSGTGNA-H--

SITVGRISYLLGLRGPVAVDTACSSSLVAVHLACQSLRLRETDLALAGGVSITLRPETQIA--ISAW----GLL-SPQGRCAAFDAA---A-DGFVRGEG-  
AGVVVVKR--LTDVARDGDQ-VLAVVRGSAVNQDGRSN----GVTAPNTAAQCDDVIADALRSGD---VA-PDS----VNYVEAHGTGTVLGDPIEFALAA-TY---  
GH-GGDACALGAVKTNIGHTLEAAAGIAGFIKATLAVQHRATIPPNLHFS-QW-NPAID--AASRFFVPTQNSPWPTAEG-----  
PRRAAVSSFGGLGTTNAHVIIQEGSEEGEDTGVSTLVVTGKTAQRMAATAQVLADWMEGPGAEEVAVADV AHTVNHHR

>sp|Q7TXM0.1|PPSA\_MYCBO\_RecName\_\_Full\_Phthiocerol/phenolphthiocerol\_synthesis\_polyketide\_synthase\_type\_I

PIAVVGMGCRFPGGISCEPALWDFLCERRSS-ISQVPPQR-WQPFEGGPPEVAALAR-TTR-WGSFLP---  
DIDAFDAEFFEISPSEADKMDPQQRLLLEVAWEALEH---AGIP---PGTLRRSATGVFAGACLSEY----GAMASA--DLSQVDGWSNSGGA-M--  
SIANRLSYFLDLRGPVAVDTACSSSLVAIHLACQSLRTQDCHLAIAGVNLNLSPAVFRG--FDQV----GAL-SPTGQCRAFADAT---A-DGFVRGEG-  
AGVVVVKR--LTDVARDGDR-VLAVICGSAVTDQDGRSN----GLMAPNPAQAQMAVLRAAYTNAG---MQ-PSE----VDYVEAHGTGTLGDPIEARALGT-VL---  
GRPEDSPLLIGSVKTNIGHTLEAAAGIAGFIKTVLAVQHRGQIPPNQHFV-TA-NHIP--FTDLRMKVVDVTQTEWP--AT---GH-----  
PRRAGVSSFGGTTNAHVIEQEGQEGQLSPA VSTLVVAGKTMQRVSATAGMLADWM-EGPGAVALADV AHTLNHRS

>sp|Q9ZGI2.1|PIKA4\_STRVZ\_Full\_Pikromycin\_polyketide\_synthaS

PMAIVGMSCRFAGGIRSPEDLWDAVAAGKDL-VSEVPEERGWDDISLYDPVPG-RKGTTYVR-NAAFDL---  
DAAFGDAEFFEISPSEADKMDPQQRLLLEVAWEALEH---AGIP---PGTLRRSATGVFAGACLSEY----GAMASA--DLSQVDGWSNSGGA-M--  
AVASGRIAYSLGLEPAVTVDTACSSSLVALHLALKGLRNGDCSTALVGGVAVLATPGAFIE--FSSQ----QAM-AADGRTKGFASA--A-DGLAWGEG-  
VAVLLER--LSDARRKGHR-VLAVVRGSAVNQDGRSN----GLTAPHGSPQQLIRQALADAR---LT-SSD----VDVVEHGTGTRLGDPIEAQALLA-TY---  
GQAPGSPLLRGLKSNIGHTLEAAAGIAGFIKTVLAVQHRGQIPPNQHFV-TA-NHIP--FTDLRMKVVDVTQTEWP--AT---GH-----  
LRRAGVSAFVGTTNAHVLEEAPAEPPAGGGVVPVSAKTSAAALDAQIGQLAAYA-EDRTDVPDPAVAARALVDSRT

>sp|Q9ZGI3.1|PIKA3\_STRVZ\_Full\_Pikromycin\_polyketide\_synthaS

PVAIVGMACRLPGGVASPEDLWQLVAGDGA-ISEFPQDRGWDVEGLYDPPDP-ASGRTYCR-SGGFLH---  
DAGEFDAAFFGISPSEALAMDPQQRLLLEVAWEALEH---AGIP---PGTLRRSATGVFAGACLSEY----GAMASA--DLSQVDGWSNSGGA-M--  
GFLSGRIAYSLGLEPAVTVDTACSSSLVALHLALVQALRKGECMDALAGGVTVMNADLFVQ--FSRQ----RGL-AADGRSKAFATS--A-DGFGPAEG-  
AGVLLVER--LSDARRNGHR-VLAVVRGSAVNQDGRSN----GLTAPHGSPQQRVIRRALADAR---LA-PGD----VDVVEAHGTGTRLGDPIEAQALLA-TY---  
GQSEIQPLRGLKSNIGHTLEAAAGIAGFIKTVLAVQHRGQIPPNQHFV-TA-NHIP--FTDLRMKVVDVTQTEWP--AT---GH-----  
LRRAAVSSFGISGTNAHVLEEAPAEPPAGGGVVPVSAKTPAALDAQIGQLAAYA-DGRTDVPDPAVAARALVDSRT

>sp|Q9ZGI4.1|PIKA2\_STRVZ\_Pikromycin\_polyketideS

PVAIVGMACRLPGGVASPEDLWRLVAGGEDA-ISGFPQDRGWDVEGLYDPPDP-ASGRTYCR-AGGFLD---  
EAGEFDAAFFGISPSEALAMDPQQRLLLEVAWEALEH---AGIP---PGTLRRSATGVFAGACLSEY----GAMASA--DLSQVDGWSNSGGA-M--  
SIMSGRVS YTLGLEPAVTVDTACSSSLVALHLALVQALRKGECGLALAGGVTVMSTPTTFVE--FSRQ----RGL-AEDGRSKAFAAS--A-DGFGPAEG-  
VGMLLVER--LSDARRNGHR-VLAVVRGSAVNQDGRSN----GLTAPNGSPQQRVIRRALADAR---LT-TAD----VDVVEAHGTGTRLGDPIEAQALLA-TY---  
GQDTEQPLRGLKSNIGHTLEAAAGIAGFIKTVLAVQHRGQIPPNQHFV-TA-NHIP--FTDLRMKVVDVTQTEWP--AT---GH-----  
LRRAAVSSFGISGTNAHVLEEAPVDEPSVGGVVPWLVS AKTPAALDAQIGRLAFAA-SQGRADPGA VARVLADGRA

>sp|Q9ZGI5.1|PIKA1\_STRVZFull\_Pikromycin\_polyketide\_S

PVAIVGMACRLPGGVASPEDLWRLVAGGEDA-ISEFPQDRGWDVEGLYHPDPE-HPGTSYVR-QGGFIE---  
NVAGFDAAFFGISPSEALAMDPQQRLLLEVAWEALEH---AGIP---PGTLRRSATGVFAGACLSEY----GAMASA--DLSQVDGWSNSGGA-M--  
SVMSGRVS YTLGLEPAVTVDTACSSSLVALHLALVQALRKGECMDALAGGVTVMSTPTTFVE--FSRQ----RGL-AEDGRSKAFAAS--A-DGTSWSEG-  
VGMLLVER--LSDARRNGHR-VLAVVRGSAVNQDGRSN----GLTAPNGSPQQRVIRRALADAR---LT-TSD----VDVVEAHGTGTRLGDPIEAQALLA-TY---  
GQDDEQPLRGLKSNIGHTLEAAAGIAGFIKTVLAVQHRGQIPPNQHFV-TA-NHIP--FTDLRMKVVDVTQTEWP--AT---GH-----  
LRRAAVSSFGISGTNAHVLEEAPVGSVGGVTPWVVS AKSAAALDAQIERLAFAA-SRDRTV DAVAHVLADGRA

>TRINITY\_DN10243\_c0\_g1\_i2\_

-----HINTLEQSKTL-----RFLNKITMKIRFSFEIINCKILN---IGID---PNSLSGTNTGIFIGSCYDEF-----V--  
NAYSNDHTKFGVGTK---QFFAEMVAHKFNLRGPKSLIDTACASSFSALHEAIVSLRSNQCDDRAIVMGLNICLRATTQLT--FTHM-----NMI-SPDGHCCKLDED--  
-A-NGTAKGEA-LVVMILQK--KSEAKR----ITATVHTKTNCDGTTELQ---ITYPSTEFQRDLIRDTTSEIG---ID-PLN---  
VKTCEAHCTGTQAGDPTEMRAICE-SM----CIERKDPLLIGALKSNIGHAEGASGFCSLTKVILSFENKCIPANMHMT-VP-NSRIE-GLVSGILKPVIKNTQFE----  
-----GELACLNCFGFGGVNVHVIVKHNDKHQIVNQIPRLVQMCGRNEELNQTFTSLLRNP--EKLTRDYLSLINDISKTSP

>TRINITY\_GG\_3134\_c21\_g1\_\_TRINITY\_GG\_3134\_c21\_g1\_i2

DIVISGVGGRFPES-DSIDEFRDNLNNVDM---ITADDRRWPTPLYGMSPP---RMGKLK-----EIDKLDSTFFGIVPKVADEVDPQARILLETTYEAIFFD---  
AGIN---PQTLRGSNTGVYGYTSVE-----VQEDLQ--SSKVESLLWFQGNS-K--  
AFYANRVSFVDFHGPSMSIDVACAASMV ALDIAVTDIRLGLKCDQAIVAGVSINLQPFNTNHI--YQVN----NIG-SKEGMSRVWDQD---A-NGYVRGET-  
VASLFLQR--KSDSKR----IYATILHSRTNIDGYKISG---MFFPSSSEQYDLMVTTYTEAG---IN-PHD----VNYFEHGTGTVGDPQEARAILE-AY---  
CKDRKSVLPVGLLKSNIHGEGASGASLAKLLIVYENKKIPANLNLK---TLKTEIAEMV PPLVPVTENTDYE-----  
PGIAGVNSFGIGGVNCHALLKPNKK-----LVNICGRTEEA VNYIFEFIEKNP--QKVRTDFLALIGEIVNPVS

>TRINITY\_GG\_3293\_c9\_g1\_\_TRINITY\_GG\_3293\_c9\_g1\_i10

-----NQRMGKLK-----EIDKFDGVFFGLMSEIADAVDPHSRILLETTYEAICD---AGVN---  
PQTLRATKTGVYIGYSSIE-----IQLDSR--TSMKDSATWAPGSS-K--  
AMYSNRISFFDFKGPSLVIDTACSSSMVAFDVA VTDLRLGKCDQAIVAGVGTNICLQPFNTNHI--YQTI----KFN-SPDGISRVWDEE---S-VGFVRGET-  
VACLFLQR--KSDAKR----IYATVLHSRTNIDGYKMG---PFFPSSSEQYDLMVTTYTEAG---VD-PLD----VTYFEHGTGTVGDPQEARAIFN-AY---  
CDGREGTLPGLLKSNIHGEGACGIASITKVIISYENECLPNLNLK---QLKTEISVMCPLFPVTENLTYI-----  
PGIAGVNSFGVGGVNGHALLQPNYE-----LINICARNEDSLKSMFNIESHS--NKITQHFLALITDVMKTKP

>TRINITY\_GG\_3293\_c9\_g1\_\_TRINITY\_GG\_3293\_c9\_g1\_i4

EIVISGMSGRFPES-DSTDEFAQNLNKNVDM---ITEDRRRWPTDLYS---MNQRMGKLK-----EIDKFDGVFFGLMSEIADAVDPHSRILLETTYEAICD---  
AGVN---PQTLRATKTGVYIGYSSIE-----IQLDSR--TSMKDSATWAPGSS-K--

AMYSNRISFFDFKGPSLVIDTACSSSMVAFDVAVTDLRLGKCDQAIVGGTNICLQPFTNHI--YQTI----KFN-SPDGISRVWDEE---S-VGFVRGET-  
VACLFLQR--KSDAKR----IYATVLHSRTNIDGYKMG---PFFPSSECQRDLMTVTTYKEAN---VD-PLD---VTYFEAHGTGKAGDLQEARAIFN-AY----  
CDGREGLPIGLLKSNIHGHEGACGIASITKVIISYENECIAPNLNLK-QL-KTEIS--VMCPPLFPVTENLTYI-----  
PGIAGVNSFGVGGVNGHALLQPNYE-----LINICARNEDSLKSMFNFIESH--NKITQHFLALITDVMKTKP

>TRINITY\_GG\_3293\_c9\_g1\_\_TRINITY\_GG\_3293\_c9\_g1\_i8

-----NQRMGKLK-----EIDKFDGTVFFGLMSEIADAVDPHSRILLETYYEAICD---AGVN---  
PQTLRATKTGVYIGYSSIE-----IQLDSR--TSMKDSATWAPGSS-K--  
AMYSNRISFFDFKGPSLVIDTACSSSMVAFDVAVTDLRLGKCDQAIVGGTNICLQPFTNHI--YQTI----KFN-SPDGISRVWDEE---S-VGFVRGET-  
VACLFLQR--KSDAKR----IYATVLHSRTNIDGYKMG---PFFPSSECQRDLMTVTTYKEAN---VD-PLD---VTYFEAHGTGKAGDLQEARAIFN-AY----  
CDGREGLPIGLLKSNIHGHEGACGIASITKVIISYENECIAPNLNLK-QL-KTEIS--VMCPPLFPVTENLTYI-----  
PGIAGVNSFGVGGVNGHALLQPNYE-----LINICARNEDSLKSMFNFIESH--NKITQHFLALITDVMKTKP

>TRINITY\_GG\_4863\_c25\_g1\_\_TRINITY\_GG\_4863\_c25\_g1\_i2

DIVISGVAGRFPES-DNIDELKENLYNNVDM---ITEDERRWPLGLYGLPTRS-GKIK-----DLSKFDAQFFGVHKGKANLMDPQARLLELTYYEAIAD--  
AGIN---PQTLRGTGTGVYIGACVSEV-----EEGLAM--DISKVSQYALTGCS-R--  
SMFANRVSYTFDFHGPSYSMDTACSSSFLALQQAVALGLRTGQCDMAVVGGVNICLRPVSALQ--FHLK----NML-AVDGKCKFLDAS---A-NGYVRSET-  
CSVIFLQK--KSEAKR----IYATVIHAKTNTDGYKDGQ---ITYPSWQSQSALMNSTLREAG---IK-PTD---INFVEAHGTGTGAGDPTEQAIFD-VF---  
CDGREGLPIGLLKSNIHGHEGACGIASITKVIISYENECIAPNLNLK-QL-KTEIS--VMCPPLFPVTENLTYI-----  
DGVVAINSGFVGGVNVHVLKPKHQYRVIDNIPRLPICGRTEESVNYILDLEQNP--KKVTRDLLALLYDISQTN

>TRINITY\_GG\_6264\_c208\_g1\_\_TRINITY\_GG\_6264\_c208\_g1\_i1

-----NTLEQSKYL-----RFLNKITMKIRFSFEIINCKILN---IGID---PNSLSGTNTGIFIGSCYDEFV-----  
NAYSNDHTKVFVGYK---QFFAEMVAHKFNLRGPKSLIDTACASSFSALHEAIVSLRSNCQDRAIVMGLNICLRATTQLY--FYHM----NMI-SPDGHCKCLDED-  
--A-NGYAKGEA-LVVMILQK--KSEAKR----IYATVVHTKTNCDDGYTELG---ITYPSYEFQORDLIRDYSEIG---ID-PLN---  
VKYCEAHCTGTQAGDPTEMAICESMC-----ERKDPDLLGALKSNIGHAEGASGFCSLTKVILSFENKIPANMHMT-VP-NSRIE-GLVSGILKPVIKNTQFE---  
-----GELACLNCFGFGGVNVHVIVKHNDKHQIVNQIPRLVQMCGRNEELLNQFTTSLLRNPEKLT--RDYLSLINDISKTS

>TRINITY\_GG\_6449\_c125\_g1\_\_TRINITY\_GG\_6449\_c125\_g1\_i1

RVVVTGLGIVSPIG-VGVEKVVNNLISGRCG-ITEVIGSG-YES-----IPCK-IAAYVPK---NDLCLEQSF---AKNELRRLSKSTIYALIAAEEALTD---  
AKWK---PTKERDKETGVAVGMGMVDEVVESGTVLRDV--GFNKISPHFVTKVL-M--  
NMPAGHISMRYGLTGNHTVSTACTTGVSIGDAFNFIQRGAADVMICGGTEAVISPLSIAS--FARIRALCTQFNDNPSKASRPFDK---R-CGFVMGEG-  
CGLVVLEE--LNHALNRKAK-IYAEIIGYGLSGDANHITA----PREDGKGAFECMKASIDDAH--IR-LDD---VTHINSHATSTPLGDKAELIAIKQ-LF---GE-  
HSKNIAITSTKGTSTHLLGAAGSVEAIFILSCYNSLIPPTINLE-EPIDKELN-----IVANNPQEWN--TK---N-----RRIAITNSFGFGGTNASLVSINF-----  
-----

>TRINITY\_GG\_6449\_c125\_g1\_\_TRINITY\_GG\_6449\_c125\_g1\_i2

RVVVTGLGIVSPIG-VGVEKVVNNLISGRCG-ITEVIGSG-YES-----IPCK-IAAYVPK---NDLCLEQSF---AKNELRRLSKSTIYALIAAEEALTD---  
AKWK---PTKERDKETGVAVGMGMVDEVVESGTVLRDV--GFNKISPHFVTKVL-M--  
NMPAGHISMRYGLTGNHTVSTACTTGVSIGDAFNFIQRGAADVMICGGTEAVISPLSIAS--FARIRALCTQFNDNPSKASRPFDK---R-CGFVMGEG-  
CGLVVLEE--LNHALNRKAK-IYAEIIGYGLSGDANHITA----PREDGKGAFECMKASIDDAH--IR-LDD---VTHINSHATSTPLGDKAELIAIKQ-LF---GE-  
HSKNIAITSTKGTSTHLLGAAGSVEAIFILSCYNSLIPPTINLE-EPIDKELN-----IVANNPQEWN--TK---N-----RRIAITNSFGFGGTNASLVSINF-----  
-----

>TRINITY\_GG\_6602\_c113\_g1\_\_TRINITY\_GG\_6602\_c113\_g1\_i1

-----NLTQAPFSNGI--YQSI----GLL-ASDGKCKVWDKR--A-DGFVRSET-VGALFLQK--KSEAKR----IYATLLHAKTNTDGFKAIG---  
LFSFVLRQRDLMIETYHEAG--VD-PND---IKFFESHGTGTNVGDPQEAKAIAAD-AY---  
CHDRKEPLLLGAVKSNLGHSESSGLCSVAKVIVAFENKIPANLHFE-EP-KPEIE-CVVNKTLPVPMKNTPE-----  
NGIVGNSFGVGGVNAHALLKSNKDYKIADPIPRLVNVSGRTEAAVKHIFDFIENNP-RKAHRALLNDSMKTLVIRGS

>XP\_002589799.1\_hypothetical\_protein\_BRAFLDRAFT\_90481\_\_Branchiostoma\_floridae\_

EVAIVGLWCRFPFA-EGPDEFWRVLENGEDC-MREIPPER-WNQEAWYNPDRN-TPGKSFVE-RAGFVD---  
DFKDFDNRLFNISDLEASRMDPQQRWMLCSYKALEN---AGIP---LKNVYNTDTGVFVGMNYDY-----YWNSTLDMADVSSNTATGVS-I-  
PVVANRVSYAFNLTGPSMTVDTACSSGMTALHLGCQAIRAGDCTMAICGGVNFILNPGMFVQ--LCRA-----GMV-CPDGRCKPFSAA---A-NGYARGEG-  
CGVVIKS-----FRKEQLIRRLYEQHN--VD-PRH---IDYIEAHGTGTPVGDVPEARSLGKAIGQSRDSS--  
EPPVLIGSVKSNFGHLESAAAMAGLIKVLLMMKHKKIAPTLHFN-EP-NPNID--FEGLIKVCTEPIWSSRNKD-----  
KMMACVNSFGVGGNAHAILFSEPSLGRHEEPNIAVSANGKESLQASMKDLISFLEKNQC-TALSQAYTSSVKRT

>XP\_002598380.1\_hypothetical\_protein\_BRAFLDRAFT\_96863\_\_Branchiostoma\_floridae\_

KVAIVGIGCRYPGVHTPADFWTMAEGRDC-TIPPDVVR-FDTSFLWHPY-K-TPGKLYNR-CGGYLQ---  
NVFEFDRQFFKIPPEANHLDPQIQLLEVTWEALEN---AGIP---PRSIRGNTGVYVGVTSSEY--LT-MTCS---PYSNISQYNTSGTN-S--  
CMVSNRISYEFDLHGSPFSVDTACSSLSYIHLASEAIRKGDSCMAIAGGVNMLLPTISVG--FCQA-----GML-SPDGKCKSFDAS---A-DGYCRSEG-  
AGVVLKPL--LSRALADGDR-VYAVIRGGTLTNDGR--TP--GIANPSYDAQLDLVEKACAAAK--VH-PHD---IQYVEAHGTGTVGDRTEANALGQ-IL---  
GRKEDPPLYIGSVKSNFGHAEGAAGVAGIILKALMISKQIPRVVHFS-SP-NPDIH--FDALNIKVPSTLLQWE-----GKG-----  
SRLAGCSSFGGGANAHILRPPTRGTERETKTIMLLSGNTKAALKEQVEHWISFL--SDTTDRFLQSLYTAANRG-

>XP\_002599684.1\_hypothetical\_protein\_BRAFLDRAFT\_205831\_\_partial\_\_Branchiostoma\_floridae\_

SIAIVGLWCRFPHA-DSPDDFWRVVLVNGEDC-MEEIPDR-WSQDAWYSPDKN-APGKIFVQ-RAGFVQ---  
GYKMFDPFLGLRDEEASRMDPQQRFMLECSYKAFEN---AGIT---MDELHGSDTGVFVGLMNTY-----LLDGDIL--DLQMTNHTITGTA-T--  
SLVAARVAYTFNLTGPALTVDTACSSGLYAVHLGCQAIKTGDCSMAVCGGVSFILRPNMFVS--LCRA-----GMA-SPEGRCKPFSAA---A-DGYARGEG-

CGVVILKK--LSKALENNNDH-IWGVIIH-TAVNQDGRRTIP---ITAPSQSQEKLRLSILERYR---FD-PDH---IDYIEAHGTGTPVGDPEANSLGN-VI---  
GKADDDPVLGKSVKGNHGLESAAGLAGLIKVLMMKQYKQIVPNVHFD-RP-NPNID--FDHLRLYVPTVLDWT-----LRG--  
KDRRLACVNSFGFGGSNSHALVEQFPQVNEKQAYVVVVVSAKRESLKLSEVEDLIEHL-EQNPDISLERLAYTSTVRRRT

>XP\_002605916.1\_hypothetical\_protein\_BRAFLDRAFT\_87410\_\_Branchiostoma\_floridae\_

PIAVVGIGCRMPGGTTPSPKFWDVISEGRNV-ITEVPAER-WSLDQVYHSTDPH-QPGTHVTR-RAGFVD---  
DIDMFDHTFFKISPREAAMMDPQQRHLLLEVITYEAFED---AGIT--PESVSES-CGVFVIGMMDY-----ALNMAD--DKHLFNSYANTGVA-H--  
SVAANRISYAFNLKGPSLAVDTACAASMTALHLACSSLRNKECSVALVEGANVLLMPEVTVV--FSAM-----GVL-SPDGRSFPDAS---A-NGYVRSEG-  
FGAAILKP--LSDAIRDRDH-VYSVIRGSAISDNQFSQS-----ITMPSSSQEKLRLMRTTYARFG--VP-LSS---VMYVEAHGTSTPVGDPAEAEAIK-TF---  
GRRPASPLKIGSAKSNFGHMECAAGMVGVIKTALMLDRRALCPVSNYT-KP-SPKAD--FDELGISVQTEVETFP--DN---K-----  
KVTLGVNSFGFGGSLAHVIMEANSAPDQEGDFILPLSGKSPDALRDLAKWLTYSK-DEKDA---INVSSWVATRRN

>XP\_002608071.1\_hypothetical\_protein\_BRAFLDRAFT\_91451\_\_Branchiostoma\_floridae\_

PVAIVGIGCRMPGGTTPSEKFWDVISEGRNV-ITEVPPER-WSLDQVYHSTDPH-QSGT-HVTRKAGFVD---  
GIDMFDHTFFKISPREAAMMDPQQRHLLLEVITYEAFED---AGIV--PEKVSSES-CGVFVIGMMDY-----AMGLAP--NRHLFNSYASTGLE-H--  
SLAANRISYAFNLKGPSLAVDTACAASMTALHLACSSLRNKECSVALVEGANVLLMPEVTVV--FSAM-----GVL-SPDGRSFPDAS---A-NGYVRSEG-  
FGAAILVLP--LKDAAARDGDH-ICYVIRGTAADNNGFSQ-----SITMPSSSAQEILMKNTFARFG--VP-LSS---VSYIEAHGTSTPVGDPAEAEAIK-TF---  
GPHRRSPLKIGSCKSNFGHMECASGIVGVIKTALMLDRRLTCLPSINFT-SP-NPEVD--FEALSVSQTKLEPFVTNE-----  
KMIAGVNSFGFGGSLAHVIMEANSAPDQEGDFILPLSGKSSDALRDLSSKWLTFQ--DEKD--ALSWSWVATRRN

>XP\_002610100.1\_hypothetical\_protein\_BRAFLDRAFT\_89867\_\_Branchiostoma\_floridae\_

--AVVIGICRMPGGTTPSPKFWDVIREGRNV-ITEIPPER-WSLEAYHSTDPH-QSGTHVTR-KAGFVD---  
DIDMFDHTFFKISPREAAMMDPQQRHLLLEVITYEAFED---AGIT--PESV-SESCGVFVIGMMDY--AL-FMAG---DKHLFNSYVNTGIA-H--  
SVAANRISYAFNLKGPSLAVDTACAASMTALHLACSSLRNKECSVALVEGANVLLMPEVTVV--FSAM-----GVL-SPDGRSFPDAS---A-NGYVRSEG-  
FGAVLIK--LSDAIRDRDH-VYSIIRGSAISDNQF--SH---SITMPSSSAQEQLMRTTYARFG--VP-LSD---VLYVEAHGTSTPVGDPAEAEAIK-AF---GP--  
ASPMRIGSAKSNFGHMECAAGMVGVIKTALMLDKRTLCPVSNYT-SP-TPKTD--FEELGISVQTKVENFP--DN---Q-----  
IVKLGVNSFGFGGSLAHVIMEANSAPDQEGDFILPLSGKSSDALRDLSSKWLTFQ--DEKD--ALSWSWVATRRN

>XP\_003222100.1\_PREDICTED\_\_phthioceranic/hydroxyphthioceranic\_acid\_syntheselike\_\_Anolis\_carolinensis\_

-IAITGICNFPGG-EGLDSEFWTVLENGRNC-TTEIPPER-FNISEWYEPDNN-KPNKICTT-RAALLD---  
EFNAFDHQLFGINKEEAHIDPQKLLLECTYRALED---AGVT--RENISDTKTGVFVGLKNRDY--ES-IASR---AVGKTHYDGTGTA-S--  
STAANRISYAFNLKGPSLAVDTGHSSFLSALHLGKAIKQGDCEAALCGGVNCHIEPRVVFV--LKA---KML-SPDGITKPFK---A-DGYGRGEG-  
CGVLLKP--LMKAQEDLNK-IWGVLSITAVSQNGK---P---VTKLQVEQEKLRLSIYPA-Q--IN-PSV---VQYIETHSIGNPAQDTAEASLGN-II---  
GTSNPLLLKIGSVMGNIHTESAAGAAGLIKVLMMHGHKIVPSLHFS-ES-NSSIN--TKKLNLIPTTVEKWD--ES---S---  
EFGRVAGINCFGYEGNIIHAVVRQVQKRPV---ELFIISA VSGCSLRQTMEDTARYV--KRNDINLQNLAYTSACRRS

>XP\_003222101.1\_PREDICTED\_\_phthioceranic/hydroxyphthioceranic\_acid\_syntheselike\_\_Anolis\_carolinensis\_

EVAIVGICNFPGG-EGLDNFWQVLEVGKNC-VQEIPPER-FDTTEWYDTSN-KQKTTTK-HAAFID---  
EFNTIDNKLFGINDVEVEYMDPQKLLLECTYRALED---AGVT--RENINGSSTGTGVFVGMNQDY--RI-TRSR---TSCTINHYDGTGTA-M--  
SIAANRISYAFNLKGPSLAVDTACSSFLSALHLGKAIKQGDCEAALCGGVNCHIEPRVVFV--LKA---KMI-SPEGISKPFST---A-DGYGRGEG-CAVLLKLP--  
LKAQEDFSK-IWGVISMASAVNQNGRSVTP---ITRPSQEQENLLRRIYPA-H---VD-PTT---VQYVEAHGTGTPAGDPVEAESVGN-VL---  
GKSNFPPIKIGSVKGNIGHTESAAGAAGLIKVLMMHGHKIVPSLHFS-ES-TSSIN--TEKLNLIPTTVEKWD--EP---S---  
EFGRIAGINSFGFGGTNAHVVRQVQKRPV---ELFLISSASVNSLKLTMEDMARYL--KTKDIALPNLAYTSACRRS

>XP\_003222102.1\_PREDICTED\_\_probable\_polyketide\_synthase\_1\_\_Anolis\_carolinensis\_

EIAIVGICNFPGG-EGLDNFWQVLEVGKNC-VREIPPER-FDTTEWYDADSN-KQKTTTR-HAALIE---  
EFNSFDNRLFGINEVEAEYMDPQKLLLECTYRALED---AGVT--RENINGSSTGTGVFVGMNQDY--RL-LRSR---TSSTFHYDGTGTS-M--  
SIAANRISYAFNLKGPSLAVDTACSSFLSALHLGKAIKQGDCEAALCGGVNCHIEPRVVFV--LKA---KMI-SPEGISKPFST---A-DGYGRGEG-CAVLLKLP--  
LRKAQEDFSK-IWGVISMASAVNQNGRSVTP---ITRPSQEQENLLCKIYPA-H---VD-PST---VQYVEAHGTGTPAGDPVEAESVGN-VL---  
GKSNFPPIKIGSVKGNIGHTESAAGAAGLIKVLMMHGHKIVPSLHFS-ES-TSSIN--TEKLNLIPTTVEKWD--EP---S---  
EFGRIAGINSFGFGGTNAHVVRQVQKRPV---ELFLISSASVNSFKLTMEDTARYL--KTKDIALPNLAYTSACRRS

>XP\_004081384.1\_equisetin\_synthetase\_eqxS\_\_Oryzias\_latipes\_

GVA VVGICNFPGG-EGLENFWKVLVNGKNC-CVPIPRER-FDTRSWYDPPDT-KAGKSRTA-KAAFMD---  
GFNEFDHRFFGISEVEEQMDPQKLLQCVYRALEN---AGIP--MEKASGTRTGVFVGMNQDY---ETNAAHM--HPSVINHWGTGLA-M--  
SIAANRISYAFNLKGPSLAVDTACSSFLSALHLGKAIKQGDCEAALCGGVNCHIEPRVVFV--LKA---KMI-SPEGISKPFST---A-DGYGRGEG-  
CGVLLKP--LKRALQDLHDH-IWGVITKTAIQDGRSVV---MTKPSVKQEQELLRRIYSEQD-----TAA---VQFIEAHGTGTPIGDPTEAESISN-VITKARPP-  
GSQVLVWGSVKSNIHTESTAGMAGLIKVLMMHGHKIVPSLHFS-ES-EKSSVDVKALNIKIPQVVEKWE--CS---G-----  
PRVAGVNNFGFGGTNAHVVRQVQKRPV---ELFLISSASVNSFKLTMEDTARYL--KTKDIALPNLAYTSACRRS

>XP\_005144267.1\_PREDICTED\_\_fatty\_acid\_synthase\_\_Melopsittacus\_undulatus\_

DVVIAGIAGKLPES-ENLQEFWENLLNGVDM---VTEDDRRWKPGMYGLPKRN-GKLGK-----  
DISKFDASFFGVHPKQAHMTDPQLRLLLEVITYEAVLD---GGIN---PTTLRGDTGTGVVIGASGSEA-----AEAFSQ--DPEKLLGYSMTGCQ-R--  
AMLANRISYAFNLKGPSLAVDTACSSFLSALHLGKAIKQGDCEAALCGGVNCHIEPRVVFV--LKA---GML-SPDGACKAFDAS--G-NGYCRSEA-  
AVVLLTK--RSMKR-----IYATIVNAGSNTDGFKEQG---VTFPSGDMQQQLVRSLYKECN---IR-LED---VEYVEAHGTGTPVGDPEQINGVNI-IF--HQCK--  
RKPLLGSTKSNMGHPPEPAGSLAALAKVILSLEHGLWAPNLHFN-TP-NPDIP-ALQDGTLEVVCCKPTPVK-----  
GGLVCINSFGFGGANAHVILRPNENPLETFNIPRLVQICGRTQEA VETLIQESRKHGRC---SPFLSMLTDISTVPV

>XP\_005153144.1\_PREDICTED\_\_polyketide\_synthasenoribosomal\_peptide\_synthetase\_\_Melopsittacus\_undulatus\_

EIAIVGICNFPGG-DGIDNFWKVLVEGRNC-TEEIPPER-FIVKEWYDPDEN-KPGKICTT-RAALLK---  
EFNSFDNHLFGINNMEAMDPQKLLIECTFKALED---AGVP---VEAISGNTGTGVFVGMNQDY--EV-ITSR---IVIEMNHYDGTGSA-M--

SIANRVSTFNTLTPSLTIDTACSSFLFALHYALQTIKSGDCEAAICGAVNCIDPRTFVSS--LSKA----KMI-SPDGLSKPFSKQ--A-DGYGRGEG-CGVLFLLKP--  
LKKAKEDHSK-IWGVINISAINQNGKATP----ITRPSQIQENLLRRIYET-H---VD-PSV----VQYIEAHGTGTAAAGDPTEAESLGN-VI---  
SKSEVILKIGSVKGNIGHTESAAGAAALIKVLLMMHGGKFPVPSLHYS-KE-MSSID--TEKLNLEIPTTVEPWE--ES--G----  
EYGRVAAINCFGFGGTNAHVVRQAKQKRPL---ELVLLSAASSKSLQMTMADTADQL--STRNITLPSLAYTSACRRS

>XP\_005643614.1\_hypothetical\_protein\_COCSUDRAFT\_49000\_\_Coccomyxa\_subellipsoidea\_C169\_

--VDIMGFSCRFPES-ETPTQFWEVLVAGTDM---VTENDRRWPVGLHGTPGRF-GKLP-----EYHLFDAPFFSVHKGKQASKMDPQMRKLLLEVTHEAFVD-  
--SGID---YKALRGRSRVGVYVGGCCGSEV----HAMWLS--DYNNTITGYEQGTCT-L--  
SMFANRLSFFFDKGPSKAVDTACSSAFMALHDAVLDLQGRVVDYAVVGGSSAIFRPATSLA--FLRL----KML-SPDGACKSFDAS---G-NGYARAEG-  
VASIILRRSDVFDTPVIVPREPYARVMGIGTNNNDGHTTEQG---ITFPSPGAQQLGTAVCRATG---ID-PSD---IQYVEAHGTGTVVGDSQELSAIDG-  
LYGAGAGHTPEEPLIGSVKSNMGHCCEGCSGLAGLIKVLLSYENGLIPGNLHYK-EP-NPNE-SLKTGILKVVVTGATPWQ-----  
GGLVAISSFGFGGSNVHAIAGCVREELFPPELPIVARTQEGSQSLEIAIKARA-FMADKLPKRLANHLSDVVG

>XP\_005646747.1\_ketoacilsyntdomaincontaining\_protein\_\_Coccomyxa\_subellipsoidea\_C169\_

----IGLSRFPES-NGPAEFWTNLDIGTDM---LTTDDRRWPIAFQGLPPRS-GKAP-----GFDKFDAAFFSVHKGKQASKMDPQLRKLLEVAIEAWVD---  
AGID---FRALRGRSRVGVYVGGCCGSEV----HAQWVA--DIDSITGYEQAGCA-R--  
SMFANRLSFWFDHFGPSKCIDTACSSSLTAFNDASDFEAGRIDYAMVGGTSGIFKPQTSIA--FQRL----HML-SPDGTCKSFDAS---A-NGYARSDG-  
IAAVLRRRPLSEAPVWAPRRPYARVLAACATNNDGHTKEG---ITFPSPGAQKALAQVCAKAG---LA-PSA---VGYIEAHGTGTVADGQELGAIEE-  
WYGRAGARTPDNPLIGSVKSNMGHCCEGCSGLAGLIKVLLSYENGLIPGNLHYK-EP-NPNSA-GLRDGILKVVTEPTAF-----  
EGIAALSNGFGGTTNVHLLQGGGWEQSRATGKVIPLACRTQEGMAEVVKILQGLP-GGEESVVDPMRCWANS CGGS

>XP\_006815698.1\_PREDICTED\_\_uncharacterized\_protein\_LOC100373061\_\_Saccoglossus\_kowalevskii\_

AIAVVGIAICRFPGA-NLDDEYWRVLSNGENH-LREIPKER-WNNDAFYSNDKK-EMGKNYVR-HAAFID---  
RYDEWDRFRFQINDDEAMRMDPQQNILLECYKALEN---GGFP---VNELAGSNVGTYYIG-----  
DCAMVCGGINLILSPTLFISS--LSRA----RMA-SATGKCPFSAD---A-DGYARGEG-CGVVVLKP--LQKAIKDGDI-IWGI-VGTGNCQDGHFATP---  
ITAPSGKQEELENLVYAKY---VD-PSM---VTYIEAHGTGTVPDPIEANS LGH-FIGQARSQ-  
GKPPCVYGVSKNIGHLEAGAGVAGLIKVLLMMKYRKNIPSLHFS-KA-NKKIN--FAELCLKVTEFVDWK-----VNEGDI--  
SLTACVNSFGFGGTNAHAIVTSYSKPRCSQEKSHIALS AKTRESLILMIKHLKRSIQDQDQ-PTLSALAYTSTVRR

>XP\_012938829.1\_PREDICTED\_\_lovastatin\_nonaketide\_syntheselike\_\_Aplysia\_californica\_

-----ASVPGA-DNVEQFWRVLEQGENH-VVEIPKER-WNNDAFDFTDVH-AVGKSYVK-RAGLLK---  
DPKAFDNKLFNINDFEADQMDPQKQFVLECCFMAMED---AGIT---REQLAGSNTGVYVGMANGDY----RGLFTA--KSPIVGNVYVTGIS-N--  
SIIARSVSTFDLRGPMSTLDTACSSALVAIHVGAQALRTGDCDLALCGGTNFMSPDVFVH--LSKA----HNV-SPTGQCFASFDS---A-DGYTRGEG-  
CGMVILKR--LKDALRDGDH-IWATI-ETGNSQDGHSTVP---ISAPSGDQQLRLETVYQDAA---MD-LEG---IDYIEAHGTGTSAGDPVEAKALGT-FF-----  
GTRVYGVSKNIGHLEAGAGVAGLIKVLLMMKYRKNIPSLHFS-KA-NKKIN--FAELCLKVTEFVDWK-----VNEGDI--  
RRNKIACVNSFGFGGTNCHAVVKAFFEQSEVLSIPICVCFSAKHEKSLKGSIEDFVQHPEVSS--LDVHDVSYTSTVRRD

>XP\_013068913.1\_PREDICTED\_\_probable\_polyketide\_synthase\_16\_\_Biomphalaria\_glabrata\_

AIAIIGIAFKGPGA-ENLEQLWEVLEGGKNY-VLDLPKDR-WNVDAFYDPPDQ-ATGKYYTR-KAGLLS---  
NPLDFNTFFDINDIESDQMDPQKQFVLECYRAMEH---AGIT---RRSIQSGKTGVYIGAMNCDY----RGLFTA--KSPIVGNVYVTGIS-N--  
SIIARSVSTFDLRGPMSTLDTACSSALVAIHVGAQALRTGDCDLALCGGTNFMSPDVFVH--LSKA----QMV-SPTGQCFASFDS---A-DGYTRGEG-  
CGVILK--LSD-----YE-----IEYIEAHGTGTQAGDYAEANALGK-FF-----  
GSSKRLIGSIKTNIHLESAAGVAGLIKVLLMMQHNKFPVPSLFE-SL-NPKIN--FDDLNLVVPKVVREWS-----  
TENKVGSVNSFGFGGSNCHAVVRSVVTQTNQVNNACVCFSGKTVTSLMGLSLRDLANYKRLK--LDVHDVSYTSTVRRD

>XP\_013068917.1\_PREDICTED\_\_mycocerosic\_acid\_syntheselike\_\_Biomphalaria\_glabrata\_

EIAVIGVGFKGPGA-DNLEQLWMVLENGENK-ISEIPKDR-WNSDAFYDSDTE-ATGKYYSR-KAGLLS---  
NPHEFDCSFFNISEIESEQMDPQKQFVLECYRAMEH---AGIT---RDKIGSKTGVYIGAMNCDY----RGLFTA--KSPIVGNVYVTGIS-N--  
SIIARSVSTFDLRGPMSTLDTACSSALVAIHVGAQALRTGDCDLALCGGTNFMSPDVFVH--LSKA----QML-SRSGQCFASFDS---A-DGYTRGEG-  
CGVILK--LSDAERDNDP-ILAVI-TTGTNQDGHSTVP---ISAPSMSQIQLLEDMYRDLSS--LEQLDE---IEYIEAHGTGTQAGDYAEANALGK-FY-----  
GSSKRLIGSIKTNIHLESAAGVAGLIKVLLMMQHNKFPVPSLFE-SL-NPKIN--FDDLNLVVPKVVREWS-----  
TEKKVACVNSFGFGGSNCHAVVRSVVTQTNQVNNACVCFSGKTVTSLMGLSLRDLANYKRLK--LDVHDVSYTSTVRRD

>XP\_013079084.1\_PREDICTED\_\_phthiocerol\_synthesis\_polyketide\_synthase\_type\_I\_PpsClike\_\_Biomphalaria\_glabrata\_

QIAVIGISCKVPGA-DNVEQYWKLENGENH-VIDIPKER-WNNDAFYDPPDQ-AIGKSYVR-RAGLLK---  
DPIAFDNKLFNINDFEADQMDPQKQFVLECYRAMEH---AGIT---REKLAGSNTGVYVGMANGDY----RGLFTA--KSPIVGNVYVTGIS-N--  
SIIARSVSTFDLRGPMSTLDTACSSALVAIHVGAQALRTGDCDLALCGGTNFMSPDVFVH--LSKA----HNV-SPTGQCFASFDS---A-DGYTRGEG-  
CGMVILKR--LKDALRDGDR-IWATI-ETGNSQDGHSTVP---ISAPSGDQQLRLETVYQDAA---MD-LEG---IDYIEAHGTGTSAGDPVEANALGK-FF-----  
GAVRHRYIGSVKTNIGHLESAAGVAGLIKVLLMMQHNKFPVPSLFE-SL-NPKIN--FDDLNLVVPKVVREWS-----  
SQNKVACVNSFGFGGTNCHAVVMEYEDMVEQKNIPCVCFSAKHEKSLKGSIEDFVNHPDVST--LDVHDVSYTSTVRRD

>XP\_013396153.1\_fusarin\_C\_synthetase\_\_Lingula\_anatina\_

AIAVIGICRFPGA-NNIDEFWQVLVNGENH-LIEIPEDR-WNSAAFYDPPGRD-TPGKSYVK-QAAFVQ---  
HHDAWDRFRFMINDAEARMDPQAMVLECYMALEN---AGIT---REDIFGTTGVYVGMANGDY----SALVNA--DLVEINHHAFTGSS-N--  
SIIANRVSTFNTLQGPSLVDACSSAMVALHLLAAQALRTGECTTIAAGGCNLMITPENFVP--LCRA----KMM-SAKGQCQAFCAD---A-DGYARGEG-  
CGMVIMKR--LKDALHDHDIWAVV-GTALNQDGHSTVP---ISAPASQETLLKHICYKYQ---VD-PAE---LQYAEAHGTGTPIGDPIEVALGK-  
VLGKSRKE-DDLPLFVGVSKNIGHLESAAGVAGLIKVLLMMRAGKIAPSLHYTPERGNPKIN--FDEIRMKVPTVTDWPPSPKG-----  
YRMCCVNSFGFGGTNGHAIVREHLNPEHGDDQTYIVAVSGTSEGSTQGLTHTLVERLRTGQ--YTLNEVAYTSTCRRT

>XP\_013403200.1\_phenolphthiocerol\_synthesis\_polyketide\_synthase\_type\_I\_PpsDlike\_\_Lingula\_anatina\_

KVAIVGIGCRFPGEINNVKDFWEVLLKGIDC-TRPLPDDR-FDVNHFYHPTPK-TPGKLYVR-GGGYLEQ---  
DLLSFDRLLFFKMPDPEANHMDDPQVRLLEVVWEAFED---GGIP---ARSIRGTNCGVYMGVTASEY--TT-LTSA----RSDAISQYSNSGTN-S--  
CMVSNRISYEFDLHGPSLSIDTACSSSLYAVHLASEAIRNGDCDMAVAGGVNVMMPETIG--FCQA----GML-APDGRSKSFDSS---A-DGYRSEGE-  
GGVILKS--LNKAVEDGDR-IVAVIRGGALSNDGR--TP---GIANPSYSAQVNLVYRACRHAM---IN-PQD---IQYVEAHGTGTQVGDTEANALGK-TI---  
GQAKT-PLYIGSVKSNIGHCEGSSGIAGVIKVALMIHNELIPPVVHFH-KG-NPKIK--FKELNIKVPKELIWP--YV---EEM-----  
PLIAGCSSFGGANAHVILEAPPS-----VVLISAATTTALSSRVDDFIELF--RKIQERFYDVAATTCLRSH

>XP\_013405320.1\_PREDICTED\_phthiocerol\_synthesis\_polyketide\_synthase\_type\_I\_PpsClike\_Lingula\_anatina\_

AIAIVGVGCRFPGA-DDIDEFWKVLNENGENH-VIDIPKER-WNNDAFFSSDPD-APGKTYVT-RAGFVK---  
GHIEWDNRLFVNDLEAARMDDPQRFVLDCCYMALEN---AGIP---TPDIQGSRTGVYVGMNNDNF-----ADMFET--DVSSMNNYSLTGAS-N--  
SITAARVSYVFNLLGPCMSVDTACSSAMVATHLGCQALKNCECNMALCGGVNAIMMPTMHVP--LSKA----RMV-SPTGQSQAFSSA---A-DGYARGE-  
CGIVLKR--LKDALKDGR-IVAI-GTGVNQDGRTHP---ITAPSGSQAALLKEVFLRYH--VN-SDD---IQYVEAHGTGTQAGDPVECNAGS-  
FLDRKARV--APECYIGSVKTNIGHLESAAGVAGLIKVLLMMKHEKIVPSLHFKGRPANPKIN--FHELRLRVPTVMNWTPEGK-----  
PRLACVNSFSGGANAHVVMQFDRTEAFEKSPHIAISAQNVQWLEQITKNLMEKVSNE--YSLRDIARTSTCRRT

>XP\_013759672.1\_fatty\_acid\_synthase\_Thecamonas\_trahens\_ATCC\_50062\_

KVVISGLSCRFPE-EDAETFFANLVAGTDM--VTADRRWDMTMDARSLPARSGK-----  
SIAEFDARFFAVTGKAADKMDPQLRLLHATHEAVTD---AGWT---LDELAGSSTGVVWAGSFS-----DSHFDLLEDATAITGYEHTGCL-L--  
NMFANRISYFNDLHGPSLSDTACSSAMVATHLGCQALKNCECNMALCGGVNAIMMPTMHVP--LSKA----RMV-SPTGQSQAFSSA---A-DGYARGE-  
IAAIVLDA--ADTARN----AYLDDLVAACNNDGYTPQG---ITYPSSDAQVALIRSCLAAG---AT-PED---  
VVYVEAHGTGTQAGDSVEANALDEVFVKHVLRSRSPENPLLGVSVKSNMHCENVSGLAGIHKVCLAARAGVLPNHYT-QP-NPKIP-  
ALLSGTMRVVTQPTPWR-----GGLVAISSFGFGGTNAHALVRA---PQPARAADDSDQSTDLAALRAEVVQLLQSY-TGELAAALSRLASLFGSAP

>XP\_015783256.1\_fatty\_acid\_synthase\_Tetranychus\_urticae\_

DIVISGISGRFAES-DNIDELAKNLFNDVDM--ITEDRRWPLGLYLPT--RSGKIK-----DLSKFDAQFFGVHKGQANLMDPQARMLELTYEALCD---  
AGVN--PHSLRGRTRGVYVAGASVSEV---EELAQ--DVSKVSGYALTGCS-R--  
SMFANRISYTFDFQGPSYADTACSSFLAFQALLGLRSGQDCQAIVGGVSI CLRPTVALQ--FHLK----NML-SNEGKCKHMDAS--A-DGYRSEA-  
CSVVFLQR--KSAKR----IYATVIHKTNTDGYKKEG---ITPSPRDAQRDLMKEVLEESG--IS-PTD---VNFVEAHGTGTGLDPIEIDAIAE-VY---  
CQGRTEPLLIGGVKSNLGHTEPASGLCSLAKVLI AFENKNIPANLHFN-TP-NPDIK-PLVRGQIKPIVENTPYN-----  
GGIAINSFGFGGVNHALIKSNDK-----VVTMCRGTEGVNSFFDFIEKNP--TRVTKFLALVSEVSKVPA

>XP\_015792919.1\_fatty\_acid\_synthase\_Tetranychus\_urticae\_

TIVISGLAGRFGA-DDVDQLWDLKLGKVL---YSEERDRHPSKLRNRPTALGQIN-----  
DLSRFDQFFGYDAKAAEHMGTQNRVLFVYVEALWD---AGIL---VDSLGRSRTGFFLGISAG-----DGSDQYDLDETTDP--  
VYIFNRLAYHFNWKGPSLSDTACSSFLADAIQAHWHIKHGLCDVAVVAGVNTIVDPFVNMT--AADM-----KML-SQSGFERCLDEN---A-DGFIRSET-  
IAALILQR--KPAKR----IYGEILGTSVNDGYTEEG---ITFPNRYAQADAMRSALKIAN--IS-PSQ---IDYIEAHITGTQAGDAVETSAILD-AY---  
RDNSDQPIKVGCIKSNIGHAEASAGINAVIRACKILQTSHLSPNAAYS-VP-NSRIS-GLLEGKHPVLEKQFN-----  
ANILGVNTFGFGGSNGHILKGTQPLDSSLFPRLIVFCNRTRQIEGMAQHLLTKD-ALNED--LIAMLNLSLAKP

>XP\_018429938.1\_PREDICTED\_probable\_polyketide\_synthase\_16\_Nanorana\_parkeri\_

QIAIVGIGCNFPGG-EGIDNFWKVIIEGQNC-TVEIPKER-FDTKHWYDSDYN-KPGKICTS-RAAIVE---  
GIHMFDNKLFGIHNSESQMDPQHKLQLCTYRALED---AGYP---MESIGGTETGVYIGLMNKDA--EF-IYNN---YPEKINHFNGTGTS-M--  
CIAANRISYQFNLTGPSLSLDTACSSSLVALHLACQAIKQGDCELAICGGVSCILDPRIVYA--LSKA----KMI-SPEGTSKPFSSK---A-DGYRSEGE-  
CGIVLKP--LKQAKEDYSK-IWGVICASSINQDGRSVTP---ITKPSLEQERLLSRIYTA----ID-PCS---IQYLEAHGTGTPVGDPIEVTSIGN-TI---  
GKSKMKSLKIGSVKGNIGHTES AAGMAGLIKVLLMMHHEVIPPSSLHYS-KE-LGIKQ--IEESKLVVPTAPEKWH--ED---V---  
KFRGMAGINCFGFGGTNSHV VVKYKEKRPS---EILLSAASSKSLQLSIEDTKKEL-SKMPSISLENLVYTAACRRS

>XP\_018430111.1\_PREDICTED\_LOW\_QUALITY\_PROTEIN\_uncharacterized\_protein\_LOC108802755\_Nanorana\_parkeri\_

AIAIVGMGNCNFPGG-EGIDNFWKVIIEGKNC-TVEIPEER-FNTKHWYDSDDN-KPGKIRTS-RAAIVE---  
GIHMFDNKLFGIHNSESQMDPQHKLQLCTYRALED---AGYS---MESISGSNTGVYIGIMNKDS--EF-IYNN---SPENINHFNGTGTS-M--  
SIAANRISYQFNLTGPSLSLDTACSSSLVALHLACQAIKQGDCELAICGGVSCILDPRIVYA--LSKA----KMI-SPEGTSKPFSSK---A-DGYRSEGE-  
CGIVLKP--LKQAKEDYSK-IWGVICASSINQDGRSVTP---ITKPSQEQERLLSRIYTT----ID-PCS---IQYLEAHGTGTPVGDPIEATSIGN-TI---  
GKSKMKPLKIGSVKGNIGHTES AAGMAGLIKVLFMMHHEVIPPSSLHYS-KE-LGIKQ--IEESKLVVPTAPEKWH--ED---V---  
KFRGMAGINCFGFGGTNSHV VVKXKEKRPS---EILLSAASSKSLQLSIEDIKQL-SKMPSISLENLVYPAACRRS

>XP\_026824077.1\_fatty\_acid\_synthase\_Ooceraea\_biroi\_

EIVISGIAGRYPDS-DNVELLKNNLFNKVDL---VTDDRRWRFDHAEIPQL-GKIN-----NVGKFDALFFGVHFKQAHTLDPMCRMLLEHAYEAVID--  
-AGIN--PRQLRGSRTGVFIGTCSSES-----EKTWYF--EKLQVNGFGITGCS-R--  
AMLANRISYWLGIHGPSYTLDSACSSSLYALENAYRSILDGQCDASIVGGSNLCLHPYVSLQ--YSRL----GVL-SSDGTCKCFDAS---A-NGYRSEA-  
ICVFLQK--AKDAK----IYSTVHKTNCDFGKEQG---ITPSSVMQSAALLRDCYEEESG--MS-PSS---VSYVECHATGTQVGDPEELNTIEN-IF---  
DRTPLLIGSVKSNIGHTEPVSGLCQITKVIAMETGTIPPNLHYK-TPLKGMKS--LEDGRKLVVTDTPWE-----  
GGYVGINSGFGGANANCHVILKSHTKGAKTDDLPRV VVSGRTEESVKVFLNDRVERHAND---VEYVRLHDIHADDI

>XP\_324222.1\_hypothetical\_protein\_Neurospora\_crassa\_OR74A\_

-IAIIGMSCRFAGDVSPLKLDLLAQGKSA-WSEIPKDR-FNIDGFHHPNFEKLNGT--NVIGGHFMKE---  
DVGLFDAHFFNLSAETAAALDPQFRLQLESTYEALES---AGIT---LQDVAGSNTSVYAGSFFRDY----HESLIR--DPDTPRFLLMGTG-A--  
AMASNRLSHFFDLRGPMSVDTGCSSTTLTALHQACQSLRSGESTMSIVGGANIMFNPDMFLA--MSSM----TLI-SKDGSRWAFDSR---A-NGYRSEGE-  
SATVVLPK--LDAALRDGDP-IRAVIRDSGINQDGKTE---ITTPSGEAQALIRACYERAG--LD-PGQ---  
TTYFEAHGTGTPDPIEVKAIARVFKDSRKGNGEDALLRIGSVKTNIGHTETASGVAIIVALALERQIPPSINF---  
TPNALSLDEWKLKVPTELEEWWKDG-----  
IRRASINNFYGGNSAHVIMEDYSSNNGDHHHSKVFLLSAKDEKATERMIANLKYTLHQKANIAENALLSNAHT--



>XP\_324368.1\_hypothetical\_protein\_\_Neurospora\_crassa\_OR74A\_

-VAIVGMSCLPLGGVETPGDFYRMMCRGRSG-WSKVPKDR-FNQEAYNHPDPD-HKGTFFNSQ-GGYFIKQ---  
DLSGFDAFFDVTREAEAMDPAQRLLMECTYEALLES---GGIP---REHIAAGTRTGVIFFGGNYGEH----RFSHIR--DLDTIPSFDFATGNQ-P--  
AFLSGLRAYFFNLHGPTFTVDTACSSSLHALHLA VQSIRNGECDAAVVGASHLITQPDVWVS--MSML-----RLF-SDEGRTYAFDHR---ARSGYARREG-  
CAVILKLP--VEKAFKDNDR-IFSVISHSGVSHNGRTV-----GIVAPSPDEQEQLLRDVFATAAK---ID-PRE----VGFVEAHGTGTRKGDPIEATAIYK-AVGRYL--  
SADDPL YIGSSKPNVGHLECASGLVSVIKGVLSLYYGFILPNADFD-KE-NPGIP--FKEWNNMTVAKQKQKWPW--AH-----  
KKYACVNNFSGFSNSSTCILAGPPIEHGAYTTPRLFVLSANDEQALRTSIKELGIWL--EQHAM-PRNLAYTLCQRRS

>XP\_325868.1\_hypothetical\_protein\_\_Neurospora\_crassa\_OR74A\_

PIAIVGMACRMPGNVSTPAEFWELCTRARSG-WSETPKQR-FNSARFHPNQG-KGGTLNPNV-GGNFLNV---  
DLA AFDAPFFGLTEKEAISMDPQQRLLLECTFEALEN---AGIP---KHTIAGKDVGVFVGGSFPEY----ESHFLR--DPDTIPMHQATGCA-Y--  
AMQSNRISHFFDLRGPSTADTACSSSMVAIHLACQSLRTGESSAALVGGCHLNMLPEFWIS--FSTC-----RLL-SDAGRSFSDNR---G-TGFRGREG-  
CGMIVLKP--LDQAIKDKDR-IRA VIAATGLNQGDKTP-----GITVPHGPAQ-----VYGRAG---LD-PNL----CGFVEAHGTGTRVGDPIEATAIHN-VL---  
GQSPRNPPLWIGSVKSNIGHLEGASGIAGVKAALMLERGFILPNHDFK-QP-NPRIP--WKWNNLEVPVTPQRPWP-----  
RGKKYISVNNFVGGTNGHVVLTAAPFSDKSGLRKLYVVT AHDKAALSQMKNIIVVYLEQRPEIDLTNSLAYTLGQRRS

>XP\_329445.1\_hypothetical\_protein\_\_Neurospora\_crassa\_OR74A\_

PIAIVGSSCRFTGEATSPAKLWELLKDPKDL-TREVPKDR-FNVEGFYHPDGE-YHGTTNSA-KAYFLEQ---  
DHLRFDAFFNITPKEAEIDPQQRMLLEV VYEALLES---AGYT---LDQVSDANIGCYVGNFVTFD-----ITMLQR--DDLSVSQYYATGNA-R--  
SIISNRVSYFFNFHGPSMTIDTACSSSLVALHQA VLSLRSGEAMACVSGVNLITPEQFVV--ESSL-----HML-SPTGRCHMWDDR---A-DGYARREG-  
VAAIFKP--LSKALADGDR-IEAIIRETGVNSDGRSK-----GITMPNWEAQSA LIQDTYRRSG---LN-  
ARDPIDRCQFEAHGTGT AAGDPNEARAIEDAFFGRNVSTAEVSKLLVGSVKT VIGHTEGAAGLAGLKFV VHAMINGTVPPNLHFN-RL-QPAVA--  
KYYSHLHVPTKALAWP--SV---AAGQ---PRRATVNSFVGGTNTAICEMVPLSADGQTRLPLVLSASSPRSMGAVAKCYRDYL-AQVS-  
LPLEEAWAYAYKNRT

>XP\_330106.1\_hypothetical\_protein\_\_Neurospora\_crassa\_OR74A\_

PIAII GMGCRLLPGGSHSSKLWELLKAGRTA-QSRFPSPR-FNIDGFYHPNSD-RPGSLNME-GGYFIED---  
DIRGFENSFFGINNLEATYMDPQQRKLLLEVVFETFEN---AGFT---LDQVSDANIGCYVGNFVTFD-----ITMLQR--DSEYTHRYSATGLG-T--  
TILANRISHVFNMGKPSFVIDTACSSSLYCLHAAVAALIA GECDSAIVAGANLIQSPEQQLA--TMKA-----GVL-SKTSTCHTFDSS---A-DGYARREG-  
IGAILVKR--LSDAIRDGDP-IRSVIRGTAINSGKTN-----GITLPSADGQEA VIRKAYA QAG---LG-FNE---TDYIECHGTGTAVGDPIEVAEAVSR-VF---  
KKPQGAPLLIGSVKSNLGHSEASGLSIIK VAMALEKGEIPPTYGVK-NI-NPKIK--TDEWNVQIVTETTPWP--KN---  
LPHNAGRLFRRAAGVNSFGYGGANAHAI LEAPQMPASL TRSTLFLPFGSNTAALERRVTDIAAAI--DFENVNIADLAYTLGKVRT

>XP\_330288.1\_hypothetical\_protein\_\_Neurospora\_crassa\_OR74A\_

PVAIVGMACRWPGGVHDPSQFWEFLRNKVNNG-WKEFD DPR-FSSAGFHHPNSD-RPGSMSMK--GAFLAEQ--  
DARLFDHTFFGMTGLEVETMDPSQRKLLLEVAYEAIES---AGET---WESVSGTRTG VVGFVGNFCLDH--WM-IQSR----DWDNPRPYAFTGAG-T--  
SILANRISYIFNL TGPSLFTVDTACSSSMYALHLAVNAIRAGDCESAI VASANWIADPGVQIA--LDKL-----GAL-SASARCHTFDAR---A-EGYARREG-  
FGAIYVKR--PSLAIADMSP-IRAMIRGTAINSGR--TG---GITRPSANGQETVIREAYRNAGN--LP-FRD---TSYFECHGTGT VYVGDPIEVAALGR-VF---  
APSSDDPLLIGSVKSNVGHGEGASALASIMKVVLAL EHGAIPIYDLQ-TR-NPNID--FEGAKVQPVTEVTPWP--KD---R-----  
LQRASINSFGYGGANGHCHIIDHVNI PNANTRPLVLLPLSAHNENSLELNLKALSQVV-----LPLADVAYTLGARRS

>XP\_682975.3\_probable\_polyketide\_synthase\_1\_isoform\_X2\_\_Danio\_erio\_

DIAIIGICNFPGG-EGVDNFWKVLVEGRNC-VVQIPDER-FETSEWFHPDGE-EPGKTRTT-TAALIE---  
GFNEFDQKFFGISEAEADYMDPQQRKLLQCA YRALED---AGIP---LEKVS GTRTG VYVIGLMNRDY--ET-LLNN----SPSTITHYNGTGTA-M--  
SIAANRISYIFNL TGPSLFTVDTACSSSMYALHLAVNAIRAGDCESAI VASANWIADPGVQIA--LDKL-----GAL-SASARCHTFDAR---A-EGYARREG-  
-LKKAIEDFDH-IWGI VNKTA V NQDGHVTVP---ITKPSMTQEQEALLRMIYSS-E---DF-LAN---VQYVEAHGTGTPAGDPVEAGSLSR-VI---  
AKPSLGPLFVGSVKNIGHTESAAGVAGL IKILLMMKHETIVPSLFYS-AE-NSSID--AKALNLKIPTRA EKWL--YS---G-----  
SRIK MAGLNSFGFGGTNAHAITEYVQLEPL----KLLPLSAATDQSLQLCIADTYQRI--SADEVDLQALAYTSACRRS

>XP\_793564.2\_PREDICTED\_\_probable\_polyketide\_synthase\_1\_\_Strongylocentrotus\_purpuratus\_

PVAVVGIGTRHACAGANTTDDFWKVLKEGKEC-ILDIPPER-WAIDNFHDEDQ-T-RQGMVTK-RCGLID----  
DLEGFDNLFFKISPREAASLDPQQRHLLLEVNYEAFED---AGIN---PDNLGES-CGVFV GIGMMDH-----AIQLV--DTSTTDAYTLTGIA-H--  
SVSANRISYAFNLKGPSFVDTACASGLTALHLACTSLWNRECSVALMSACNGIQLPDITVG--FSAL----GVL-SPDGRCSFSS---A-NGYVREGE-  
WGAIVLKP--LSQALADNDH-IYTVIRGSAIAANGLANS-----LTMPSPPAQEYV MKEAYEKFG---VS-MSD---VHYVEAHGTGTMVGDPLEAEAISR-AF---  
NRTKDNPLKIGSVKSNFGHTEVAAGVTA AIKV ALMMENRTIPPTINFV-SS-NPHID--PEEMKLDIVTNVQPPF--TE---D-----  
KHIIGLNSFGFAGALAHCFEEAPKSDSDEKQPIIPLSAKSPEALTAVAKQWQNLID-IDQDA--MSAVSWMSTRRRV
