# Supplementary material for: De novo biosynthesis of simple aromatic compounds by an arthropod (Archegozetes longisetosus)
Source: PubMed Central journal article supplement (PMC7542773; doi:10.1098/rspb.2020.1429), 2020-09-02
Supplement: rspb20201429supp8.pdf [file rspb20201429supp8.pdf]

**Table S3.** Relative composition of *A. longisetosus* defensive gland exudates, quantified based on the ion abundance of each individual compound per sample.

| treatment | 2,6-HMBD [%] | Neral [%] | Nerylformiat [%] | Tridecan [%] | $\gamma$ -Acaridial [%] | 7-Pentadecen [%] | Pentadecan [%] | Heptadecadien [%] | 8-Heptadecen [%] | Heptadecan [%] | aromatic [%] | terpenes [%] | hydrocarbons [%] |
|-----------|--------------|-----------|------------------|--------------|-------------------------|------------------|----------------|-------------------|------------------|----------------|--------------|--------------|------------------|
| all       | 4.62         | 5.83      | 45.18            | 7.49         | 16.07                   | 3.25             | 11.52          | 0.00              | 5.74             | 0.29           | 20.69        | 51.02        | 28.29            |
| all       | 3.87         | 6.33      | 43.47            | 6.17         | 15.61                   | 4.19             | 12.94          | 0.00              | 7.42             | 0.00           | 19.48        | 49.80        | 30.72            |
| all       | 5.48         | 7.12      | 36.40            | 5.89         | 19.66                   | 3.63             | 11.85          | 0.00              | 9.33             | 0.64           | 25.14        | 43.52        | 31.34            |
| all       | 2.76         | 35.69     | 21.56            | 7.90         | 26.10                   | 0.00             | 2.23           | 0.00              | 2.10             | 1.67           | 28.86        | 57.25        | 13.89            |
| all       | 0.00         | 0.00      | 59.90            | 6.00         | 7.55                    | 4.42             | 9.46           | 0.00              | 10.70            | 1.97           | 7.55         | 59.90        | 32.55            |
| all       | 5.38         | 7.81      | 45.28            | 5.22         | 17.35                   | 3.01             | 8.95           | 0.16              | 6.44             | 0.39           | 22.74        | 53.08        | 24.18            |
| all       | 0.00         | 0.00      | 49.81            | 7.72         | 6.11                    | 4.91             | 14.21          | 0.00              | 14.20            | 3.03           | 6.11         | 49.81        | 44.08            |
| all       | 7.50         | 9.30      | 40.33            | 5.24         | 19.10                   | 3.27             | 8.64           | 0.15              | 5.97             | 0.49           | 26.60        | 49.63        | 23.76            |
| all       | 3.11         | 1.58      | 50.41            | 7.19         | 14.00                   | 3.18             | 13.06          | 0.18              | 6.78             | 0.51           | 17.11        | 51.99        | 30.90            |
| all       | 0.00         | 0.00      | 0.00             | 0.00         | 0.00                    | 0.00             | 0.00           | 0.00              | 0.00             | 0.00           | 0.00         | 0.00         | 0.00             |
| all       | 0.00         | 0.00      | 50.68            | 10.29        | 6.20                    | 5.47             | 10.91          | 0.00              | 12.95            | 3.50           | 6.20         | 50.68        | 43.12            |
| all       | 6.05         | 9.39      | 47.62            | 6.42         | 10.94                   | 2.79             | 8.41           | 0.00              | 7.42             | 0.96           | 16.99        | 57.01        | 26.00            |
| control   | 7.33         | 18.79     | 30.97            | 4.13         | 18.91                   | 2.44             | 11.07          | 0.12              | 5.98             | 0.25           | 26.24        | 49.76        | 24.00            |
| control   | 3.75         | 0.00      | 57.46            | 3.10         | 13.00                   | 3.38             | 9.53           | 0.00              | 8.75             | 1.03           | 16.75        | 57.46        | 25.79            |
| control   | 0.00         | 0.00      | 62.52            | 1.47         | 9.46                    | 4.08             | 10.53          | 0.00              | 10.16            | 1.80           | 9.46         | 62.52        | 28.03            |
| control   | 0.00         | 0.00      | 0.00             | 0.00         | 0.00                    | 0.00             | 0.00           | 0.00              | 0.00             | 0.00           | 0.00         | 0.00         | 0.00             |
| control   | 8.17         | 7.02      | 45.55            | 5.13         | 9.98                    | 4.15             | 11.09          | 0.00              | 7.84             | 1.07           | 18.15        | 52.57        | 29.27            |
| control   | 0.00         | 0.00      | 59.72            | 0.00         | 0.00                    | 5.38             | 12.42          | 0.00              | 16.01            | 6.46           | 0.00         | 59.72        | 40.28            |
| control   | 0.00         | 0.00      | 63.73            | 1.23         | 9.00                    | 3.64             | 11.14          | 0.00              | 9.77             | 1.50           | 9.00         | 63.73        | 27.28            |
| control   | 4.74         | 5.12      | 46.62            | 2.77         | 16.01                   | 3.46             | 10.65          | 0.00              | 9.42             | 1.22           | 20.75        | 51.74        | 27.51            |
| control   | 7.95         | 15.90     | 36.34            | 3.34         | 12.98                   | 3.69             | 8.55           | 0.23              | 10.05            | 0.96           | 20.93        | 52.24        | 26.83            |

|         |       |       |       |      |       |      |       |      |       |      |       |       |       |
|---------|-------|-------|-------|------|-------|------|-------|------|-------|------|-------|-------|-------|
| control | 0.00  | 0.00  | 65.27 | 2.43 | 8.75  | 2.44 | 10.23 | 0.00 | 8.59  | 2.28 | 8.75  | 65.27 | 25.98 |
| control | 7.44  | 20.31 | 32.97 | 3.99 | 14.23 | 2.87 | 10.38 | 0.00 | 7.53  | 0.29 | 21.66 | 53.28 | 25.06 |
| control | 0.00  | 0.00  | 64.62 | 2.19 | 5.39  | 4.28 | 8.81  | 0.00 | 11.27 | 3.45 | 5.39  | 64.62 | 30.00 |
| control | 4.68  | 0.00  | 48.17 | 6.45 | 5.30  | 5.19 | 15.28 | 0.00 | 12.72 | 2.22 | 9.98  | 48.17 | 41.85 |
| control | 0.00  | 0.00  | 65.28 | 0.00 | 12.94 | 2.56 | 9.00  | 0.00 | 8.84  | 1.38 | 12.94 | 65.28 | 21.78 |
| control | 4.62  | 3.14  | 52.97 | 2.80 | 8.93  | 4.59 | 11.20 | 0.28 | 10.27 | 1.20 | 13.55 | 56.11 | 30.34 |
| control | 0.00  | 0.00  | 56.78 | 0.00 | 0.00  | 6.17 | 11.21 | 0.00 | 16.31 | 9.53 | 0.00  | 56.78 | 43.22 |
| control | 8.00  | 32.97 | 26.26 | 5.06 | 0.00  | 3.30 | 13.69 | 0.48 | 9.81  | 0.41 | 8.00  | 59.24 | 32.76 |
| control | 8.77  | 35.07 | 27.02 | 3.96 | 0.00  | 3.30 | 11.88 | 0.54 | 8.84  | 0.61 | 8.77  | 62.09 | 29.14 |
| control | 9.39  | 30.38 | 24.71 | 3.73 | 0.00  | 3.78 | 12.07 | 0.91 | 13.86 | 1.18 | 9.39  | 55.08 | 35.53 |
| control | 11.30 | 26.32 | 28.41 | 4.49 | 3.77  | 3.64 | 11.14 | 0.46 | 9.72  | 0.75 | 15.07 | 54.73 | 30.21 |
