# Supplementary material for: De novo biosynthesis of simple aromatic compounds by an arthropod (Archegozetes longisetosus)
Source: PubMed Central journal article supplement (PMC7542773; doi:10.1098/rspb.2020.1429), 2020-09-02
Supplement: rspb20201429supp9.pdf [file rspb20201429supp9.pdf]

**Table S4.** Bacterial to host copy ratio for untreated (control) and antibiotic-treated mites as assessed by qPCR

| <b>treatment</b> | <b>Ratio Bact/Host</b> |
|------------------|------------------------|
| control          | 7534.38                |
| control          | 12452.43               |
| control          | 31055.08               |
| control          | 11531.81               |
| control          | 713.96                 |
| antibiotics      | 3311.72                |
| antibiotics      | 1418.65                |
| antibiotics      | 2763.40                |
| antibiotics      | 2302.05                |
| antibiotics      | 621.37                 |
| antibiotics      | 417.31                 |
| antibiotics      | 2155.03                |
| antibiotics      | 119.20                 |
